Mini-Review

# SGLT2 Inhibition for Cardiovascular Diseases, Chronic Kidney Disease, and NAFLD

Moein Ala<sup>1</sup>

<sup>1</sup>School of Medicine, Tehran University of Medical Sciences (TUMS), Tehran, Iran

ORCID number: 0000-0001-5951-4864 (M. Ala).

Received: 29 June 2021; Editorial Decision: 30 July 2021; First Published Online: 3 August 2021; Corrected and Typeset: 22 October 2021.

## Abstract

Sodium glucose cotransporter 2 (SGLT-2) inhibitors are the latest class of antidiabetic medications. They prevent glucose reabsorption in the proximal convoluted tubule to decrease blood sugar. Several animal studies revealed that SGLT-2 is profoundly involved in the inflammatory response, fibrogenesis, and regulation of numerous intracellular signaling pathways. Likewise, SGLT-2 inhibitors markedly attenuated inflammation and fibrogenesis and improved the function of damaged organ in animal studies, observational studies, and clinical trials. SGLT-2 inhibitors can decrease blood pressure and ameliorate hypertriglyceridemia and obesity. Likewise, they improve the outcome of cardiovascular diseases such as heart failure, arrhythmias, and ischemic heart disease. SGLT-2 inhibitors are associated with lower cardiovascular and all-cause mortality as well. Meanwhile, they protect against nonalcoholic fatty liver disease (NAFLD), chronic kidney disease, acute kidney injury, and improve micro- and macroalbuminuria. SGLT-2 inhibitors can reprogram numerous signaling pathways to improve NAFLD, cardiovascular diseases, and renal diseases. For instance, they enhance lipolysis, ketogenesis, mitochondrial biogenesis, and autophagy while they attenuate the renin-angiotensin-aldosterone system, lipogenesis, endoplasmic reticulum stress, oxidative stress, apoptosis, and fibrogenesis. This review explains the beneficial effects of SGLT-2 inhibitors on NAFLD and cardiovascular and renal diseases and dissects the underlying molecular mechanisms in detail. This narrative review explains the beneficial effects of SGLT-2 inhibitors on NAFLD and cardiovascular and renal diseases using the results of latest observational studies, clinical trials, and meta-analyses. Thereafter, it dissects the underlying molecular mechanisms involved in the clinical effects of SGLT-2 inhibitors on these diseases.

**Key Words:** SGLT-2 inhibitors, molecular mechanism, ketogenesis, autophagy, inflammation, fibrosis

## Introduction

Diabetes is a major noncommunicable disease and a public health issue, which is associated with several complications such as cardiovascular diseases, chronic kidney

disease (CKD), nonalcoholic fatty liver disease (NAFLD), neuropathy, and gastrointestinal complications (1–3). These complications, particularly cardiovascular diseases and CKD, are the leading causes for mortality among

diabetic patients (4). During the last decades, new classes of antidiabetic drugs such as dipeptidyl peptidase 4 (DDP-4) inhibitors, glucagon-like peptide 1 (GLP-1) receptor agonists, thiazolidinediones, and sodium glucose cotransporter 2 (SGLT-2) inhibitors improved the management of diabetes (5,6). SGLT-2 inhibitors, carrying the suffix gliflozin, such as empagliflozin, dapagliflozin, canagliflozin, ipragliflozin, ertugliflozin, sotagliflozin, and luseogliflozin, increase the urinary excretion of glucose by inhibiting its reabsorption in the proximal convoluted tubule (7).

Previously, it was observed that SGLT-2 inhibitors can improve blood pressure, serum triglyceride, and body weight (8-10). Diabetic patients are often complicated with other components of metabolic syndrome such as cardiovascular diseases and SGLT-2 inhibitors showed protective effects on these complications (7,11,12). Regarding their beneficial effects on metabolic syndrome, numerous recent studies attempted to assess the effects of SGLT-2 inhibitors on cardiovascular and renal diseases. It was uncovered that SGLT-2 inhibitors can considerably protect against cardiovascular and renal diseases (13-15). Beyond their effects on body weight, dyslipidemia, and cardiovascular and renal diseases, they also protected against NAFLD (16,17). Their great impact on cardiovascular and renal events raised the question of whether we need them for their protective effects on cardiovascular and renal diseases or for their glucose-lowering effects.

Yet, several review articles have been published that discuss the beneficial effects of SGLT-2 inhibitors on cardiovascular diseases, renal diseases, and NAFLD (18-24). In this review, the latest observational studies, clinical trials, and meta-analyses, particularly those published during last 4 years, have been referenced to enumerate the beneficial effects of SGLT-2 inhibitors on the liver, kidney, and cardiovascular system. This review also comprehensively explains and illustrates the pathophysiological and molecular mechanisms involved in these effects and covers recent findings in animal studies. Most of the previous reviews discussed just clinical or animal studies without making a link between them, but this review attempts to explain the underlying molecular mechanisms involved in the clinical effects of SGLT-2 inhibitors.

## Mechanism of Action, Efficacy, and Safety of SGLT-2 Inhibitors for Diabetes

SGLT-2 is located in the apical membrane of renal tubular cells in the S1 and S2 segments of proximal convoluted tubule and reabsorbs 90% of filtered glucose. SGLT-1 reabsorbs the remaining filtered glucose in the S3 segment of proximal convoluted tubule (25). Together they prevent

urinary glucose excretion until plasma glucose concentration of ~200 mg/dL. Higher concentrations of plasma glucose exceeds their reabsorption capacity and leads to glycosuria. SGLT-2 is a cotransporter of Na<sup>+</sup> and glucose (25). It utilizes the downhill transport of Na<sup>+</sup> to provide energy for active reabsorption of filtered glucose. Active extrusion of Na<sup>+</sup> by Na<sup>+</sup>/K<sup>+</sup> exchanger in the basolateral membrane of renal tubular cells results in downhill transport of Na<sup>+</sup> between 2 sides of apical membrane (25). SGLT-2 inhibitors can prevent 30% to 50% of glucose reabsorption and increase urinary glucose excretion in diabetic patients (26).

SGLT-2 inhibitors significantly decrease glycated hemoglobin (HbA1c) [mean difference (MD; 95% CI) -1.35 % (-2.36 to -0.34)], fasting plasma glucose [MD (95% CI) -1.01 mmol/L (-1.98 to -0.04)], insulin requirement [MD (95% CI) -4.85U/24h (-7.42 to -2.29)] and body weight [MD (95% CI) -2.3 kg (-3.09 to -1.50)] among patients with type 2 diabetes (27).

SGLT-2 inhibitors are associated with higher risk of genital tract infection. They also increase the risk of diabetic ketoacidosis, in patients with type 1 diabetes but not in patients with type 2 diabetes. Despite concerns, SGLT-2 inhibitors do not increase the risk of urinary tract infection, bone fracture and hypoglycemia. Likewise they do not increase the risk of amputation, even in diabetic patients with peripheral artery disease (27-32).

## The Effect of SGLT-2 Inhibitors on Cardiovascular Diseases

### Clinical Findings

Diabetes and hyperglycemia are heavily associated with higher incidence and exacerbation of cardiovascular diseases such as hypertension (HTN), ischemic heart disease, stroke, heart failure and peripheral artery disease (33,34). Meta-analyses of several observational studies and clinical trials disclosed that use of SGLT-2 inhibitors is associated with markedly improved outcome of cardiovascular diseases among diabetic patients (15,35,36). Zheng et al uncovered that use of SGLT-2 inhibitors is associated with significant decrease in all-cause mortality [hazard ratio (HR; 95% credible interval (CrI) 0.80 (0.71-0.89)], cardiovascular mortality [HR (95% CrI) 0.89 (0.69-0.91)], heart failure events [HR (95% CrI) 0.62 (0.54-0.72)] and myocardial infarction ([HR (95% CrI) 0.86 (0.77-0.97)] among diabetic patients (35). They can also protect against nonfatal myocardial infarction or nonfatal stroke [relative risk (RR; 95% CI) 0.8 (0.70-0.94)] (37). Moreover, it was unveiled that use of SGLT-2 inhibitors is associated with lower hospitalization rate and decreased cardiovascular

mortality among heart failure patients with or without reduced ejection fraction (38,39). The meta-analysis performed by Malik et al uncovered that SGLT-2 inhibitors led to 22% reduction in myocardial infarction, 39% decrease in heart failure hospitalization, and 20% decrease in major adverse cardiac events among diabetic patients with CKD grade 3 or higher (40). The authors also reported that there was a decremental pattern in the incidence of stroke and cardiovascular mortality in their study (40). Interestingly, it was found that SGLT-2 inhibitors are associated with reduced risk of atrial fibrillation and atrial flutter among diabetic patients [RR (95% CI) 0.76 (0.65–0.90)] regardless of their age, blood pressure, body weight, and HbA1c (41). Even, it was shown that SGLT-2 inhibitors are superior to GLP-1 receptor agonists and other antidiabetic drugs regarding their cardioprotective effects (35,42,43). Likewise, it was observed that SGLT-2 inhibitors significantly decrease both systolic and diastolic blood pressure in diabetic patients (10,44). Further evaluations indicated that their blood pressure-lowering property is comparable to hydrochlorothiazide as a diuretic (45).

Empagliflozin provided slightly more protection among patients with atherosclerotic cardiovascular disease, while empagliflozin, dapagliflozin, canagliflozin, and ertugliflozin were nearly similar regarding their effect on patients without atherosclerotic cardiovascular disease and patients with heart failure (46-50).

### Pathophysiological Mechanisms

There are also several animal studies reporting the beneficial effects of SGLT-2 inhibitors on cardiovascular diseases and explaining the underlying molecular mechanisms. Here, these molecular and cellular mechanisms and their effect on cardiovascular system are separately discussed.

#### Hormonal and metabolic alterations induced by SGLT-2 inhibitors improve cardiovascular health

SGLT-2 inhibitors lead to weight loss, which indirectly improves cardiovascular health condition (10). SGLT-2 inhibitors augment lipolysis and decrease insulin requirement, resulting in decreased body weight (51,52). These drugs lead to calorie loss by increasing urinary excretion of glucose. However, calorie loss can partly increase food intake, but their effect on calorie loss is greater than calorie intake (53). Meanwhile, these drugs can decrease the release of positive regulators of appetite and body weight such as ghrelin and neuropeptide Y (53-55) (Fig. 4).

Overactivation of insulin and insulin-like growth factor 1 signaling pathways is critically involved in the pathogenesis of heart failure and myocardial hypertrophy (56,57). As mentioned previously, SGLT-2 inhibitors can significantly

decrease insulin requirement in diabetic patients (27). In addition to its beneficial effects on blood sugar and insulin dosage, empagliflozin attenuated the detrimental effects of insulin on the heart. This effect was mediated by decreasing protein kinase B phosphorylation, and glucose transporter 4 expression (58). Long-term phosphorylation and activation of Protein kinase B results in pathological cardiac hypertrophy and heart failure (59). SGLT-2 inhibitors can directly and indirectly modulate the cardiovascular effect of insulin and other hormones.

#### Activation of Sestrin2/5' adenosine monophosphate-activated protein kinase signaling pathway and autophagy by SGLT-2 inhibitors protects against different cardiovascular diseases such as heart failure, ischemic heart disease, and arrhythmia

Empagliflozin promoted Sestrin2-mediated activation of 5' adenosine monophosphate-activated protein kinase (AMPK), thereby inhibiting mammalian target of rapamycin complex 1 (mTORC1) signaling pathway. Activation of the Sestrin2/AMPK/mTORC1 signaling pathway by empagliflozin mitigated myocardial oxidative stress, inflammation, and cardiac fibrosis (60,61). Consistently, it has been reported that Sestrin2 provides immense protection against several cardiovascular diseases such as hypertension, myocardial infarction, arrhythmias, cardiomyopathy, and atherosclerosis (62). SGLT-2 inhibitors activate the Sestrin2/AMPK signaling pathway. Thereafter, AMPK activates tuberous sclerosis complex 2, a tumor suppressor gene. Tuberous sclerosis complex 2 directly inhibits mTORC1 (63). Similar to Sestrin2, liver kinase B1 (LKB1) was upregulated by empagliflozin in the mice model of myocardial ischemia/reperfusion (64). LKB1 is a downstream of Sestrin2 and phosphorylates and activates AMPK to improve the outcome of cardiovascular diseases (65). LKB1 deletion in myocardial cells has been associated with spontaneous onset of atrial fibrillation and atrial fibrosis in mice (66) (Fig. 1).

Sestrin2 also regulates mTORC1 through GATORs. Sestrin2 attenuates the inhibitory effect of GATOR2 on GATOR1. When liberated from GATOR2, GATOR1 inhibits RagB, a GTPase needed for mTORC1 activation (67). During nutrient deficiency Sestrin2 inhibits GATOR2 and downregulates mTORC1 (68). mTORC1 is a negative regulator of autophagy, and its inhibition strongly enhances autophagy (63) (Fig. 1). Autophagy is crucial for removal of dysfunctional organelles and misfolded proteins aggregate (69). It provides the opportunity for self-renewal and prevents cardiomyocytes death (69). Sufficient autophagic response is crucial for maintenance of cardiovascular homeostasis, improves cardiovascular health, and prevents cardiac hypertrophy and cardiomyopathy (70).

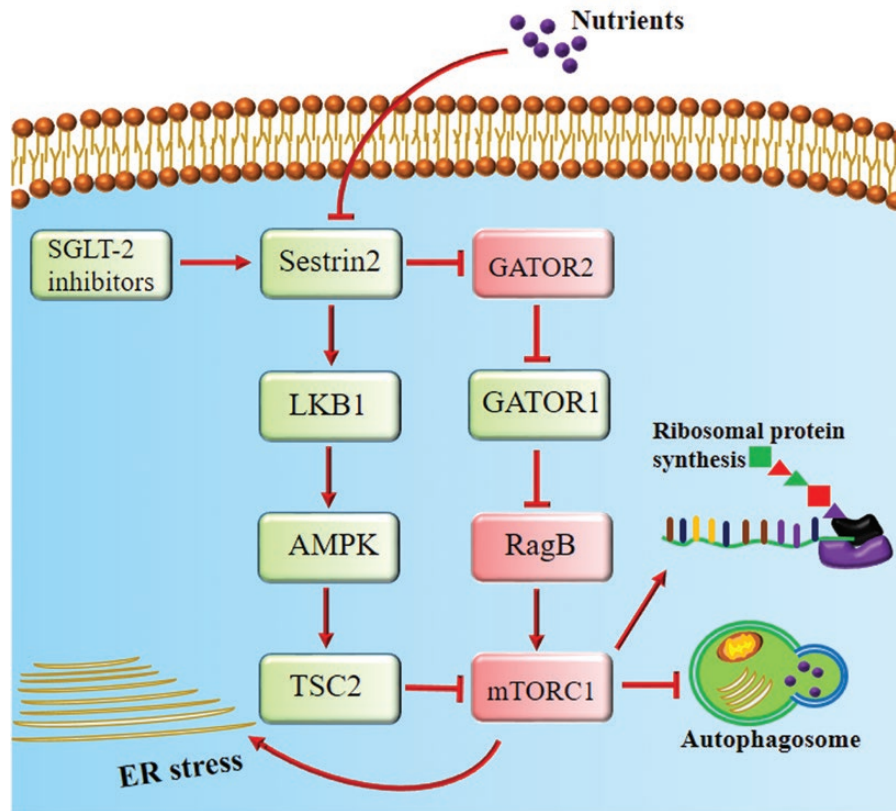

**Figure 1.** The effect of SGLT-2 inhibition and Sestrin2 on mTORC1. SGLT-2 inhibition upregulates Sestrin2. Subsequently, Sestrin2 activates LKB1/AMPK/tuberous sclerosis complex 2 signaling pathway or inhibits GATOR2/GATOR1/RagB signaling pathway to remove the deleterious effects of mTORC1 in damaged cardiovascular system. mTORC1 activates ribosomal protein synthesis, which can activate unfolded protein response and ER stress in inflammation. In addition, mTORC1 attenuates autophagy that helps to the removal of dysfunctional organelles and plays a crucial role in cardiovascular homeostasis. Contrary to SGLT-2 inhibition, nutrient sufficiency and overnutrition downregulates Sestrin2 and activates mTORC1.

Furthermore, autophagy confines myocardial injury and myocardial remodeling after myocardial infarction (71,72).

SGLT-2 inhibition also augments the Kruppel-like factor 9/vascular endothelial growth factor A pathway to improve autophagy in cardiomyocytes (73). Kruppel-like factor 9 is a transcription factor that promotes the gene expression of autophagy-related proteins and activates the cellular mechanisms of autophagy (74). Consistently, it was observed that SGLT-2 inhibition augments autophagy to ameliorate myocardial infarction in rats (75).

#### SGLT-2 inhibition improves mitochondrial function and attenuates oxidative stress to ameliorate myocardial infarction, heart failure, and arrhythmia

The heart heavily relies on mitochondrial respiration for its energy metabolism (76). Ineffective and dysfunctional mitochondrial activity results in energy depletion, contractile failure, reactive oxygen species (ROS) production, inflammation, and apoptosis of cardiomyocytes (76). These alterations in cellular level progress to heart failure in the long term (76). In addition, mitochondrial dysfunction is a major contributor for myocardial injury during myocardial

ischemia/reperfusion. Impaired calcium homeostasis and burst of oxidative stress due to mitochondrial dysfunction leads to severe myocardial injury during myocardial infarction (77).

Perturbation of mitochondrial calcium and energy homeostasis are major players in myocardial electrical and contractile dysfunction (78). Empagliflozin decreased the cytoplasmic concentration of  $Ca^{2+}$  and  $Na^{+}$  and increased the mitochondrial concentration of  $Ca^{2+}$ . This effect was mediated through inhibition of  $Na^{+}/H^{+}$  exchanger (79). Previously, it was shown that increased activity of  $Na^{+}/H^{+}$  exchanger and increased cytoplasmic concentration of  $Ca^{2+}$  and  $Na^{+}$  are responsible for deterioration of heart failure (80,81). Similarly, dual SGLT-1 and SGLT-2 inhibition by sotagliflozin significantly improved mitochondrial function of the myocardium, decreased oxidative stress, and improved left atrial dysfunction through modulation of  $Ca^{2+}$  release into the cytoplasm (82). Interestingly, Ye et al revealed that SGLT-2 inhibition activates AMPK, thereby inhibiting  $Na^{+}/H^{+}$  exchanger (83).

Sestrin2/AMPK pathway activates peroxisome proliferator-activated receptor-gamma coactivator (PGC)

1 $\alpha$  expression to improve mitochondrial and myocardial function after myocardial infarction (84). PGC-1 $\alpha$  interacts with peroxisome proliferator-activated receptor (PPAR) gamma, thereby regulating the function of several transcription factors, improving mitochondrial respiration, and decreasing ROS production (Fig. 2) (85,86). Higher PGC-1 $\alpha$  expression predicts more efficient mitochondrial function, inhibits vascular calcification, and improves cardiac function (87,88). Because of its high energy demand, the heart strongly relies on proper mitochondrial function to provide its energy requirement. Dysfunctional mitochondrial activity not only leads to energy depletion but also causes accumulation of ROS and accelerates apoptosis (89). Herein, a subset of autophagy named mitophagy can remove the dysfunctional mitochondria and prevent the subsequent destructive events (89).

Sestrin2 can activate nuclear factor erythroid 2-related factor 2 (Nrf2) by liberating it from Kelch-like ECH-associated protein 1 sequestration (90). Nrf2 is a transcription factor for numerous antioxidant genes and promotes their expression by binding to antioxidant response element (90). This function of Sestrin2 can markedly attenuate oxidative stress, subsequent to SGLT-2 inhibition. The protective effect of empagliflozin on oxidative stress and mitochondria dysfunction has been associated with decreased mortality after myocardial ischemia in diabetic rats (75,91,92).

Empagliflozin enhanced the expression of BCL2-interacting protein 3 and led to downregulation of mitochondrial fission 1 protein in cardiomyocytes (75).

BCL2-interacting protein 3 augments mitophagy in myocytes and prevents cell death (93). Uncontrolled expression of fission 1 protein leads to mitochondrial fragmentation and results in the apoptosis of cardiomyocytes (Fig. 2) (94).

Dapagliflozin, another SGLT-2 inhibitor, successfully restricted infarct size and prevented ventricular arrhythmias and left ventricular dysfunction in a rat model of myocardial infarction. Dapagliflozin enhanced mitochondrial function and increased antiapoptotic proteins such as BCL2 to improve myocardial infarction (95). Shao et al indicated that empagliflozin improves mitochondrial function of cardiomyocytes and prevents atrial fibrillation via PGC-1 $\alpha$ /nuclear respiratory factor-1/mitochondrial transcription factor A (TFAM) signaling pathway. Additionally, empagliflozin significantly attenuated oxidative stress, decreased the serum concentrations of highly sensitive C-reactive protein, and inhibited atrial fibrosis in diabetic rats (86). TFAM preserves the integrity of mitochondrial DNA. Besides, it was shown that increased expression of TFAM can profoundly mitigate cardiac dysfunction (Fig. 2) (96). According to these findings, amelioration of mitochondrial dysfunction accounts for a major proportion of cardioprotective effects of SGLT-2 inhibitors.

#### SGLT-2 inhibition attenuates endoplasmic reticulum stress and endoplasmic reticulum stress-mediated apoptosis in the cardiovascular system

Endoplasmic reticulum (ER) is heavily involved in Ca<sup>2+</sup> homeostasis in cardiomyocytes; hence, ER stress and the

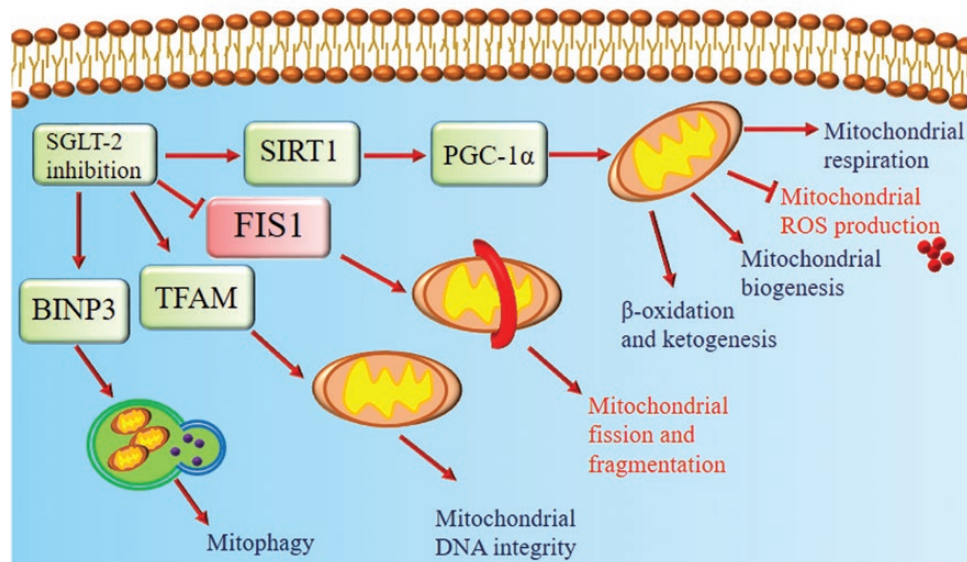

**Figure 2.** The effect of SGLT-2 inhibition on mitochondrial homeostasis. SGLT-2 inhibition activates SIRT1/PGC-1 $\alpha$  signaling pathway, which can improve mitochondrial respiration, mitochondrial biogenesis,  $\beta$ -oxidation, and ketogenesis and confines mitochondrial ROS production. BCL2-interacting protein 3 and TFAM upregulation by SGLT-2 inhibitors can enhance mitophagy and maintain mitochondrial DNA integrity, respectively. SGLT-2 inhibitors downregulate fission 1 protein, thereby preventing mitochondrial fission and fragmentation.

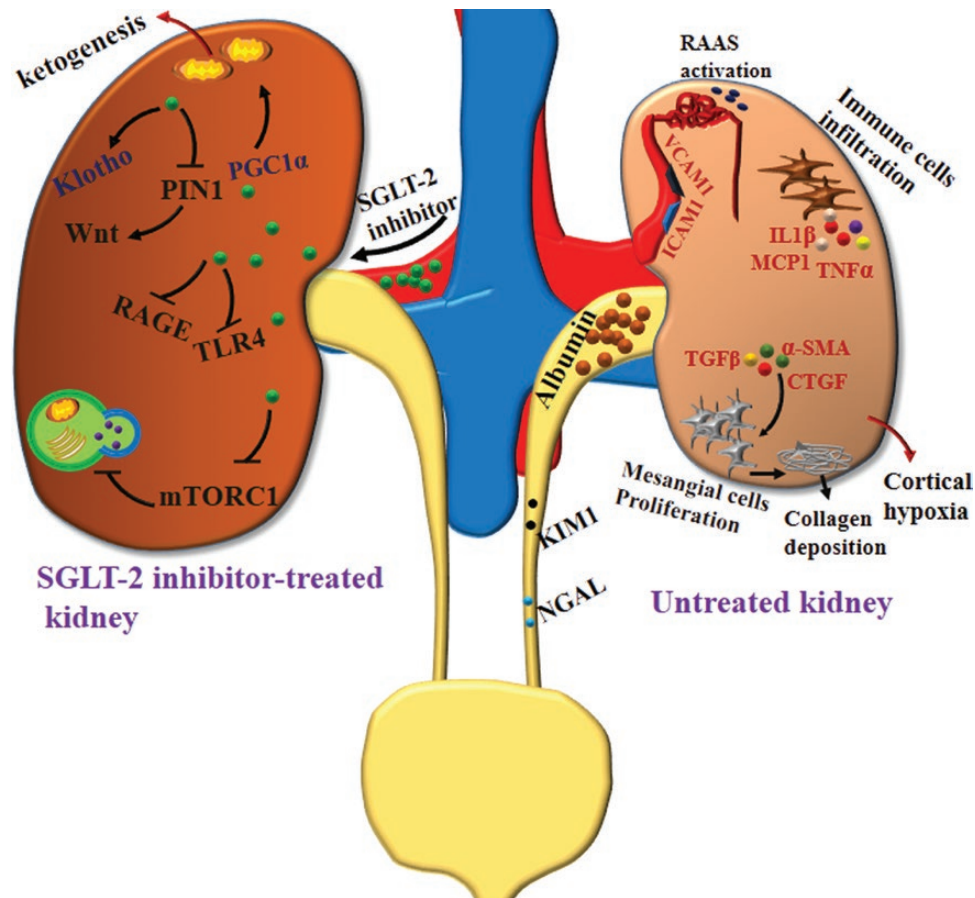

**Figure 3.** The protective effects of SGLT-2 inhibition on diabetic nephropathy. SGLT-2 inhibition improves mitochondrial function and expedites ketogenesis through PGC-1 $\alpha$ . SGLT-2 inhibition suppresses TLR4 and RAGE signaling pathways and attenuates the inhibitory effect of mTORC1 on autophagy. SGLT-2 inhibitors downregulate peptidylprolyl cis/trans isomerase, peptidyl-prolyl cis/trans isomerase never in mitosis A-interacting 1/Wnt pathway, upregulate Klotho, thereby decreasing TGF- $\beta$ ,  $\alpha$  smooth muscle actin, and connective tissue growth factor and preventing mesangial cells activation. SGLT-2 inhibitors can reduce the expression of intercellular adhesion molecule 1, vascular cell adhesion molecule 1, and MCP1, which confine immune cells infiltration and alleviate inflammation. Further, SGLT-2 inhibition suppresses RAAS and ameliorate the detrimental effect of RAAS on kidney fibrosis and albuminuria.

following dysregulation of Ca<sup>2+</sup> homeostasis impair heart function (97). ER stress plays a pivotal role in the development of heart failure (98). Furthermore, ER stress is dramatically activated and involved in atherosclerotic plaque rupture and myocardial injury following myocardial infarction (97).

SGLT-2 inhibition vigorously attenuated the detrimental effects of ER stress on cardiomyopathy, mediated through downregulation of activating transcription factor 4 (ATF4), CCAAT/enhancer binding protein homologous protein (CHOP), X-box binding protein 1, tumor necrosis factor (TNF) receptor-associated factor 2, and caspase 12 (99). Overactivation of ATF4/CHOP pathway results in the overexpression of proapoptotic proteins and activates ER stress-induced apoptosis (99,100). X-box binding protein 1 and TNF receptor-associated factor 2 can also augment the inflammatory response after ER stress (101). mTORC1 activation increases ribosomal protein synthesis during

inflammation, which causes unfolded protein response, ER stress, and subsequently apoptosis (102). SGLT-2 inhibitors can prevent the initiation of ER stress by inhibiting mTORC1 and also attenuate the progression of ER stress to apoptosis (Fig. 1).

#### SGLT-2 inhibitors-mediated ketogenesis enormously benefits cardiovascular system

SGLT-2 inhibitors vigorously stimulate ketogenesis even they are associated with slightly increased risk of diabetic ketoacidosis among diabetic patients (28,103,104). Ketogenesis and ketogenic diet can enormously protect against cardiovascular system. For instance, ketogenesis protects against myocardial ischemia, improves mitochondrial function, and prevents apoptosis and myocardial dysfunction (105,106). Furthermore, ketogenesis promotes autophagy and prevents oxidative stress,

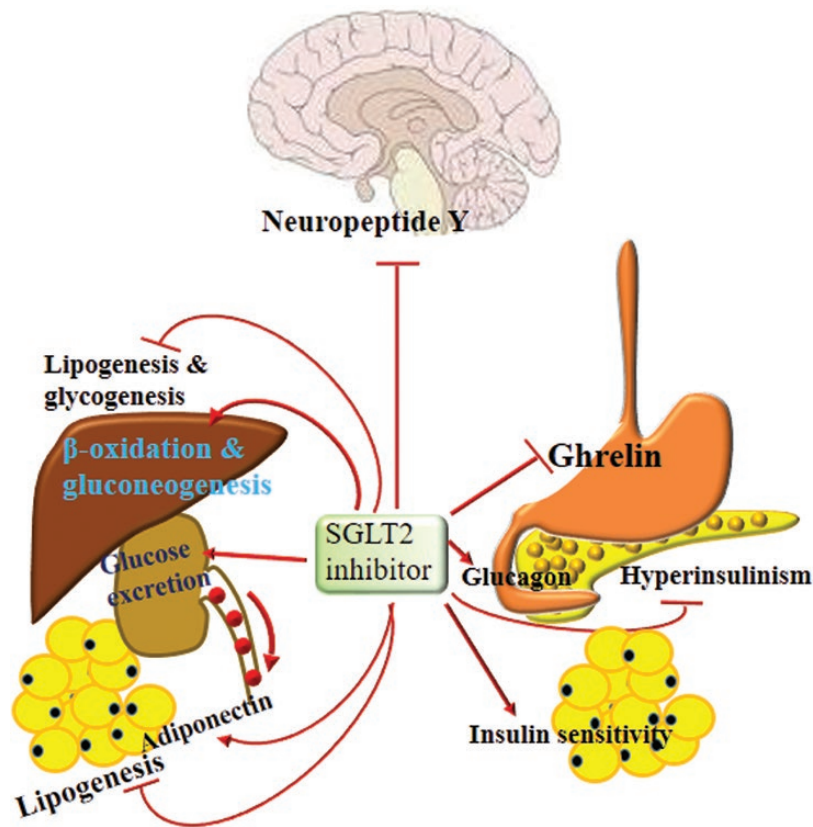

**Figure 4.** The protective effect of SGLT-2 inhibitors on obesity, lipid metabolism, and NAFLD. SGLT-2 inhibition leads to urinary excretion of glucose in the kidney and decreases insulin requirement and lipogenesis in the liver and adipose tissue. Further, SGLT-2 inhibition can suppress the appetite through downregulation of neuropeptide Y and ghrelin. SGLT-2 inhibition stimulates ketogenesis and gluconeogenesis and prevents fat and glycogen accumulation in the liver. SGLT-2 inhibition also increases adiponectin and glucagon that can mitigate NAFLD.

atherosclerosis, and myocardial remodeling (107,108). Recent meta-analyses uncovered that ketogenic diet is associated with better body weight control, better glycemic control, and improvement in dyslipidemia among diabetic patients (109,110). SGLT-2 inhibitors enhance sirtuin 1 (SIRT1) expression and activate SIRT1/PGC-1 $\alpha$ /fibroblast growth factor 21 (FGF21) signaling pathway to promote ketogenesis. Furthermore, this pathway promotes autophagy and improves heart cells function and viability (111,112). AMPK partly mediates the positive effect of SGLT-2 inhibitors on SIRT1/PGC- $\alpha$ /FGF21 axis (113). In addition, potentiation of ketogenesis by SGLT-2 inhibitors can protect the heart against energy depletion (114). Based on these findings, augmentation of ketogenesis can enormously support cardiovascular health during stress condition.

#### SGLT-2 inhibition prevents atherosclerotic plaque formation and rupture by modulating endothelial dysfunction, inflammation, and macrophages activity

Empagliflozin enhances the expression of endothelial nitric oxide that results in vasodilation and protects against atherosclerosis, hypertension, and other cardiovascular

adverse events (60). It was observed that empagliflozin ameliorates endothelial dysfunction in diabetic rats (115). It upregulated Nrf2 and strongly attenuated oxidative burst. Moreover, empagliflozin inhibited advanced glycation end-products/receptor for advanced glycation end-products (RAGE) signaling pathway, which is a major contributor for vascular inflammation, oxidative stress, and macrophage recruitment in vascular complications of diabetes (115).

Dapagliflozin showed protective effect on the formation and stabilization of atherosclerotic plaques in a mice model of atherosclerosis. It suppressed oxidative stress, downregulated NLR family pyrin domain containing 3 (NLRP3), prevented macrophages infiltration, and decreased inflammatory cytokines such as interleukin (IL) 1 $\beta$  and IL18 (116-118). Indeed, SGLT-2 inhibition activated AMPK signaling, thereby suppressing NLRP3 inflammasome (118). Furthermore, SGLT-2 inhibition significantly reduced monocyte chemoattractant protein 1 (MCP-1) and vascular cell adhesion molecule 1 (VCAM-1) to prevent inflammatory cells infiltration into vessels' wall (119). Oxidized lipoproteins, ROS, and ER stress activate NLRP3, thereby stimulating macrophages response

in atherosclerosis (120). SGLT-2 inhibition vigorously modulates the deleterious effects of numerous harmful mechanisms.

Dapagliflozin also decreased inducible nitric oxide expression and attenuated Toll-like receptor 4 (TLR4)/nuclear factor kappa B (NF- $\kappa$ B)/tumor necrosis factor alpha (TNF- $\alpha$ ) signaling pathway to prevent lipid accumulation and hinder atherosclerosis (121). The TLR4/NF- $\kappa$ B pathway promotes the expression of inflammatory and fibrogenic molecules such as MCP-1 and transforming growth factor  $\beta$  (TGF- $\beta$ ) that can aggravate atherosclerosis (122).

Sestrin2 knockout led to decreased AMPK phosphorylation and increased NF- $\kappa$ B phosphorylation in mouse aorta endothelial cells. In addition, Sestrin2 knockout led to ER stress and burst of oxidative stress in these cells (123). Hyperglycemia and oxidized low-density lipoprotein can downregulate Sestrin2/AMPK pathway in monocytes and accelerate mTORC1 signaling. Activation of mTORC1 signaling increases the expression of inflammatory mediators and differentiation of M1 macrophages (124). Genetically augmented Sestrin2/AMPK pathway reversed these effects and increased M2 macrophage differentiation (124). Sestrin2-mediated inhibition of mTORC1 also induces autophagy in macrophages and enhances their M2 polarization (125). Autophagy is crucial for atherosclerotic plaque stability. Attenuation of autophagy results in increased oxidative stress and apoptosis of lesional macrophages and leads to atherosclerotic plaque necrosis (126). Similarly, it has been demonstrated that higher proportions of M2 subtype of macrophages are associated with plaque stability, while increased abundance of M1 subtype predicts atherosclerotic plaque instability (127). Hence, SGLT-2 inhibition can protect against atherosclerotic plaque formation and increase plaque stability partly through upregulation of Sestrin2/AMPK/mTORC1 pathway and downregulation of NF- $\kappa$ B and NLRP3 signaling pathways in macrophages and endothelial cells.

#### **SGLT-2 inhibitors mitigate hypertension through several mechanisms**

SGLT-2 inhibition decreased blood pressure in human and animal studies (128,129). SGLT-2 inhibition can augment the blood pressure lowering effect of angiotensin receptor blockers (130). Furthermore, luseogliflozin abrogated high-salt diet-induced high blood pressure in rats. This finding shows that SGLT-2 inhibition is useful to attenuate the salt sensitivity of blood pressure (131). Takeshige et al unveiled that SGLT-2 inhibition by empagliflozin can enhance urinary sodium excretion to lower blood pressure (132). It was also shown that SGLT-2 inhibition accelerates circadian fall of blood pressure and decreases nocturnal blood pressure in hypertensive rats with a nondipper

pattern of blood pressure (132). Indeed, SGLT-2 inhibition improves circadian rhythm of sympathetic nerve, thereby ameliorating nondipper hypertension (133). The inhibitory effect of SGLT-2 inhibitors on sympathetic nervous system accounts for a major proportion of their anti-hypertensive effects (134).

Interestingly, it has been reported that angiotensin II upregulates SGLT-2 expression in the kidney. Furthermore, canagliflozin reverted the deleterious effect of angiotensin on the kidney (135). Regarding the mutual link between renal dysfunction and hypertension and the beneficial effects of SGLT-2 inhibition on both of them, SGLT-2 inhibitors are a good therapeutic option for diabetic patients who are at higher risk of both hypertension and renal dysfunction (136,137). Schork et al observed that SGLT-2 inhibitors were associated with a transient decrease in extracellular fluid volume and activation of the renin-angiotensin-aldosterone system (RAAS) in the first days of use, but these changes returned to their baseline after 3 to 6 months of use (138). According to these results, there is no concern about RAAS activation during long-term use of SGLT-2 inhibitors, and they can decrease blood pressure without compensatory increase in RAAS.

As mentioned previously, SGLT-2 inhibitors can increase nitric oxide production, thereby decreasing vascular tonicity (60). Moreover, it was observed that empagliflozin prevents arterial remodeling by ameliorating mitochondrial dysfunction in rats, which helps to mitigate the effect of long-term hypertension on the vasculature (86).

SGLT-2 inhibition improves circadian rhythm of blood pressure, enhances urinary excretion of Na<sup>+</sup>, contributes to vasorelaxation, and prevents arterial remodeling. These properties of SGLT-2 inhibitors heavily improves hypertension, itself, and hypertension-associated cardiovascular diseases such as heart failure, stroke, and myocardial infarction.

#### **SGLT-2 inhibition mitigates cardiomyopathy by upregulating reversion-inducing cysteine-rich protein with Kazal motif and attenuating NLRP3- and NF- $\kappa$ B-mediated cardiomyocytes apoptosis**

SGLT-2 inhibition decreased myocardial content of inflammatory cytokines such as IL6 and increased the production of anti-inflammatory cytokines such as IL10. SGLT-2 inhibition also increased M2 subtype of macrophages and reduced their M1 subtype. Furthermore, SGLT-2 inhibitors hindered the activation of NF- $\kappa$ B in the mice model of cardiomyopathy, which is a major driver for inflammation and promotes the expression of inflammatory cytokines (58,139). Interestingly, NF- $\kappa$ B expression in patients with asymptomatic or mildly symptomatic hypertrophic cardiomyopathy predicts progression to heart failure in the long



term (140). Downregulation of NF- $\kappa$ B also alleviates myocardial ischemia/reperfusion injury and enhances atherosclerotic plaque stability (141,142).

Previous studies unveiled that NLRP3 inflammasome is involved in the pathogenesis of cardiomyopathy and mediates the production of several inflammatory cytokines (143). In addition, NLRP3 gene silencing has been associated with notable improvement in cardiomyopathy (144). Dapagliflozin, in an AMPK-dependent manner, could downregulate NLRP3/apoptosis-associated speck-like protein containing a C-terminal caspase recruitment domain (apoptosis-associated speck-like protein containing a C-terminal caspase recruitment domain) signaling pathway in the rat model of cardiomyopathy (118). NLRP3/apoptosis-associated speck-like protein containing a C-terminal caspase recruitment domain pathway activates caspase 1 and stimulates apoptosis; hence, SGLT-2 inhibition can prevent cardiomyocytes apoptosis in cardiomyopathy (118).

Empagliflozin significantly increased reversion-inducing cysteine-rich protein with Kazal motif (RECK) expression in the mice model of diabetic cardiomyopathy. RECK prevents fibroblast migration and negatively regulates cardiac fibrosis (58,145,146). Even so, the detrimental effect of angiotensin II on cardiac fibrosis and cardiac remodeling heavily depends on downregulation of RECK (145). Therefore, SGLT-2 inhibition can alleviate cardiomyopathy by preserving cardiomyocytes viability and enhancing the antifibrotic effects of RECK.

This section attempted to illuminate the complex and interwoven molecular mechanisms involved in the protective effects of SGLT-2 inhibitors on cardiovascular diseases. It has been clarified that SGLT-2 inhibition can improve cardiovascular diseases through diverse mechanisms, and it is worth expanding their clinical application in the management of cardiovascular diseases.

## The Effects of SGLT-2 Inhibitors on Kidney Diseases

### Clinical Findings

The meta-analysis performed by Tadashi et al revealed that SGLT-2 inhibitors ameliorated the annual decline in estimated glomerular filtration rate [placebo subtracted difference (95% CI) 1.35 mL/1.73 m<sup>2</sup>/year (0.78-1.93)] in diabetic patients. They also improved the composite renal outcome [HR (95% CI) 0.71 (0.53-0.95)] (37). Similarly, Zelniker et al performed a meta-analysis, including 34 322 diabetic patients, and found that SGLT-2 inhibitors decreased the risk of progression of renal disease by 45% [HR (95% CI) 0.55 (0.48-0.64)]. Meanwhile, SGLT-2

inhibitors had the same effects on those with and without atherosclerotic cardiovascular diseases, but they were more effective in the early stages of CKD (15). Recent meta-analysis published in *JAMA Cardiology* showed that SGLT-2 inhibitors are associated with significant improvement in the kidney outcome [HR (95% CI) 0.62 (0.56-0.70)] among diabetic patients (147). SGLT-2 inhibitors lowered albumin/creatinine ratio (weight mean differences (95% CI) -14.64 mg/g (-25.5 to -4.12)) and significantly decreased the risk of microalbuminuria [relative risk (RR; 95% CI) 0.69 (0.49 to 0.97)], macroalbuminuria [RR (95% CI) 0.49 (0.33-0.73)], exacerbation of nephropathy [RR (95% CI) 0.73 (0.58-0.93)], and end-stage renal disease [RR (95% CI) 0.70 (0.57-0.87)] in diabetic patients (148). Furthermore, SGLT-2 inhibitors reduced the risk of acute kidney injury in both clinical trials [RR (95% CI) 0.64 (.53-0.78)] and observational studies [RR (95% CI) 0.40 (0.33-0.48)] (149).

The renoprotective effect of SGLT-2 inhibitors is greater than the renoprotective effect of GLP-1 receptor agonists and other antidiabetic medications (43). It seems that dapagliflozin and canagliflozin have slightly better impact on urine albumin-to-creatinine ratio, followed by empagliflozin and ipragliflozin, respectively (150-153). Furthermore, canagliflozin and empagliflozin are slightly superior in terms of glomerular filtration rate preservation, compared with dapagliflozin and ipragliflozin (148). However, these comparisons were not statistically approved and replicated by all clinical trials.

### Pathophysiological Mechanisms Involved in the Renoprotective Effects of SGLT-2 Inhibitors

Diabetes is associated with extensive molecular and cellular alterations in the kidney. Diabetes leads to mitochondrial dysfunction, oxidative burst, and increased activity of inflammatory molecules such as NF- $\kappa$ B in the kidney (154).

Diabetes and hyperglycemia significantly increase the expression of SGLT-2 in the kidney of rats (155). Animal models have shown that SGLT-2 inhibitors such as tofogliflozin and dapagliflozin can protect against renal tubular cells injury and prevent their apoptotic cell death (156,157). Besides, SGLT-2 inhibitors effectively mitigate diabetic tubulopathy by improving mitochondrial dysfunction (158,159). Empagliflozin consistently decreased the markers of tubular epithelial cells injury such as neutrophil gelatinase-associated lipocalin and kidney injury molecule 1, measured in the kidney tissue and urine of diabetic rats (160). SGLT-2 inhibition also augments autophagy in podocytes and renal tubular cells that improves their viability and prevents apoptotic cell death (158,161,162). Besides, SGLT-2 inhibitors effectively

mitigate diabetic tubulopathy by improving mitochondrial function (158,159).

Similar to the heart, activation of Sestrin2/AMPK pathway improved hyperglycemia-induced mitochondrial dysfunction in the kidney and hindered podocytes apoptosis (163). Mitochondrial dysfunction has been implicated in the pathogenesis of CKD, particularly in diabetic nephropathy (164). Suppression of Sestrin2 expression has been implicated in the pathogenesis of diabetic nephropathy (165). SGLT-2 inhibitors positively regulate Sestrin2 expression that can profoundly ameliorate oxidative stress, inflammation, mitochondrial dysfunction, ER stress, and fibrosis in the kidney (60,61,163,165).

SGLT-2 inhibition improves renal cortex hypoxia and simultaneously confines the deleterious effects of hypoxia such as oxidative stress, inflammation, apoptosis, and fibrosis in the kidney (166,167). As mentioned previously, SGLT-2 inhibitors stimulate ketogenesis (168). Using ketone bodies as the source of energy alleviates inflammation and protects against tubular cells apoptosis and renal fibrosis (169,170). Empagliflozin protected against diabetic nephropathy by attenuating mTORC1 signaling and enhancing ketogenesis. Inhibition of ketogenesis reverted the protective effects of empagliflozin on diabetic nephropathy (168). SGLT-2 inhibitors activate SIRT1/PGC- $\alpha$ /FGF21 pathway to promote ketogenesis in the kidney (Fig. 2) (171).

Empagliflozin was administered in a rat model of unilateral ureteric obstruction that leads to kidney injury. The results revealed that SGLT-2 inhibition could upregulate klotho and prevent TLR4/NF- $\kappa$ B and Wnt signaling pathways in the damaged kidney. Besides, empagliflozin decreased the expression of fibrogenic molecules such as TGF- $\beta$ , connective tissue growth factor,  $\alpha$  smooth muscle actin, and fibronectin and reduced renal fibrosis in histopathological measurement (172,173). Similarly, canagliflozin could decrease IL6, TNF- $\alpha$  receptor, fibronectin and matrix metalloproteinase 7, which are critically involved in renal inflammation and fibrosis (174). Klotho is a major molecule for preventing renal fibrosis. Consistently, decreased Klotho expression in human renal biopsy specimens has been associated with renal fibrosis (175). Furthermore, Klotho inhibits Wnt and NF- $\kappa$ B signaling pathways, decreases TGF- $\beta$  expression and attenuates ER stress; hence, SGLT-2 inhibition can prevent renal fibrosis by enhancing the expression of klotho (176-179). Overactivation of Wnt signaling pathway is frequently observed in the kidney of diabetic patients and results in podocytes dysfunction, epithelial-mesenchymal transition, renal fibrosis, and progression of diabetic nephropathy (180,181).

Canagliflozin attenuated inflammation and fibrosis in the mice model of diabetic nephropathy. It suppressed the

renal expression of TNF- $\alpha$ , connective tissue growth factor, collagen 1A1, and MCP-1 through activation of AMPK and downregulation of peptidyl-prolyl cis/trans isomerase never in mitosis A-interacting 1 (182). As a regulator of cell mitosis, Peptidylprolyl cis/trans isomerase never in mitosis-interacting 1 is essential for development of renal fibrosis. It stimulates the proliferation of mesangial cells to increase fibrotic lesions in the kidney (182-184).

In addition to attenuating NF- $\kappa$ B signaling, empagliflozin reduced the expression of high mobility group box 1 (HMGB1) and RAGE in the damaged kidney. Attenuation of HMGB1/RAGE signaling pathway prevents the release of several inflammatory cytokines such as TNF- $\alpha$ , IL6, and MCP-1 (185). Similarly, dapagliflozin ameliorated renal injury in a rat model of diabetic nephropathy via inhibition of HMGB1/RAGE/NF- $\kappa$ B signaling pathway. Attenuation of this pathway by dapagliflozin has been associated with decreased production of fibronectin, MCP-1, intercellular adhesion molecule 1, collagenase type 1, superoxide dismutase, and ROS (156). TLR4 and RAGE are major members of pattern recognition receptors (PRRs) and provoke innate immunity response (186,187). HMGB1 is a damage-associated molecular pattern and HMGB1/RAGE/TLR4/NF- $\kappa$ B/TNF- $\alpha$  axis plays a pivotal role in the activation of immune system and pathogenesis of kidney injury (188). Likewise, it was observed that blockade of HMGB1 can alleviate diabetic nephropathy in mice (189).

Shin et al showed that dapagliflozin attenuates RAAS to protect against kidney damage (190). Similarly, canagliflozin attenuated hyperglycemia-induced augmentation of RAAS and decreased renal proximal tubular angiotensinogen (191). Interestingly, a strong correlation was observed between the response of albuminuria to RAAS inhibitors and the response of albuminuria to SGLT-2 inhibitors. Patients' weak response to RAAS inhibitors predicted their weak response to SGLT-2 inhibitors (192). RAAS inhibition prevents renal fibrosis, improves albuminuria, and slows down the annual decline of renal function (193-195). Interestingly, it was observed that combination of an SGLT-2 inhibitor and an angiotensin converting enzyme inhibitor can more effectively hinder the development and progression of kidney injury in diabetic rats, compared with monotherapy with each one these drugs (196). Regarding their additive effect on the kidney, the combination of SGLT-2 inhibitors and RAAS inhibitors can be a good combination to restrict the progression of CKD in diabetic patients.

SGLT-2 inhibitors suppressed kidney inflammation and fibrosis in animal models and improved acute kidney injury and CKD among diabetic patients. The question remains whether these drugs can replicate the same results in nondiabetic population or not (Fig. 3).

## The Effects of SGLT-2 Inhibitors on NAFLD

### Clinical Findings

Recently, the meta-analysis of previous clinical trials showed that 24-week administration of SGLT-2 inhibitors for overweight or obese patients with NAFLD can effectively decrease alanine aminotransferase [weighted mean differences (WMD; 95% CI)  $-10.0$  IU/L ( $-12.2$  to  $-7.79$ )], gamma-glutamyl transferase [WMD (95% CI)  $-14.49$  IU/L ( $-19.35$  to  $-9.36$ )], as well as the absolute percentage of liver fat content on magnetic resonance imaging [WMD (95% CI)  $-2.05\%$  ( $-2.61\%$  to  $-1.48\%$ )] (197). The promising results of previous studies revealed that SGLT-2 inhibitors can improve liver steatosis in their long-term use and contribute to the management of NAFLD (198,199). According to the results of clinical trials, dapagliflozin, and empagliflozin were slightly superior to other SGLT-2 inhibitors such as canagliflozin and ipragliflozin regarding their effect on alanine aminotransferase, gamma-glutamyl transferase, and liver fat content (197,200-204).

SGLT-2 inhibitors moderately decrease body weight in both diabetic [WMD (95% CI)  $-1.86$  kg ( $-2.03$  kg to  $-1.7$  kg),  $P < 0.01$ ] and nondiabetic patients [WMD (95% CI)  $-1.34$  kg ( $-1.51$  kg to  $-1.17$  kg)] (205-207). Adding SGLT-2 inhibitors to GLP-1 receptor agonists or metformin resulted in much more improvement in body weight, blood pressure, and HbA1c, compared with monotherapy with each one of them (208,209). Weight loss can profoundly help to alleviate liver steatosis and improve NAFLD (210,211). Moreover, SGLT-2 inhibition decreases plasma triglyceride and increases high-density lipoprotein to improve dyslipidemia (212). Dyslipidemia is a major coexisting condition of NAFLD and increases the risk of cardiovascular events in patients with NAFLD (213).

### Pathophysiological Mechanisms Involved in the Protective Effects of SGLT-2 Inhibitors on NAFLD

Dapagliflozin decreased liver steatosis and fibrosis in high-carbohydrate, high-fat-induced NAFLD. It attenuated inflammation and decreased TNF- $\alpha$ , IL1 $\beta$ , and IL18 in the liver homogenate (214,215). Similarly, empagliflozin decreased the production of several inflammatory cytokines such as IL1 $\beta$ , IL6, and IL8 to improve hepatic steatosis (216-218). Similarly, ipragliflozin attenuated oxidative stress and inhibited the production of IL6, TNF- $\alpha$ , and MCP-1 to mitigate liver injury and improve hepatic steatosis (219). Likewise, canagliflozin increased BCL2 and decreased caspase 3 to prevent hepatocytes apoptosis (220).

Empagliflozin increased the decreased expression of SIRT1 to expedite fatty acid oxidation. Meanwhile, empagliflozin inhibited hepatic lipogenesis, which is markedly involved in the pathogenesis of NAFLD (216-218).

In addition, empagliflozin suppressed the gene expression of CHOP, ATF4, and growth arrest and DNA damage-inducible protein (Gadd45) to prevent the deleterious effects of ER stress on hepatocytes (221). As mentioned previously, CHOP mediates ER stress-induced apoptotic cell death (222,223). Hence, SGLT-2 inhibition can effectively alleviate ER stress and prevent ER stress-mediated apoptosis in the liver.

Empagliflozin increased the decreased expression of SIRT1 to expedite fatty acid oxidation. Meanwhile, empagliflozin inhibited hepatic lipogenesis, which is markedly involved in the pathogenesis of NAFLD (216-218). Activation of SIRT1/PGC- $\alpha$ /PPAR- $\alpha$  pathway by SGLT-2 inhibitors promotes fatty acid oxidation (224). Consistently, empagliflozin augmented  $\beta$ -oxidation to decrease the lipid content of liver. In addition, it increased the expression of PPAR- $\alpha$  and decreased the expression of PPAR- $\gamma$ , sterol regulatory element-binding transcription factor 1c and fatty acid synthase to hinder hepatic lipogenesis (221). PPAR- $\alpha$  promotes  $\beta$ -oxidation and enhances lipid catabolism while sterol regulatory element-binding transcription factor 1c/PPAR- $\gamma$ /fatty acid synthase pathway is a major driver for free fatty acid synthesis (225,226). Furthermore, it was shown that the beneficial effects of canagliflozin on NAFLD is associated with increased expression of zinc alpha-2 glycoprotein (220). Zinc alpha-2 glycoprotein activates extracellular signal-regulated kinase (ERK). Subsequently, ERK activates  $\beta$ 3-adrenergic receptors to promote lipolysis (227-230). Based on these findings, SGLT-2 inhibition can expedite the conversion of triglycerides into free fatty acids and simultaneously accelerate free fatty acids catabolism.

SGLT-2 inhibition decreases insulin levels (219). SGLT-2 inhibition accelerates hepatic gluconeogenesis and reduces hepatic glycogenesis (231,232). Excessive glycogenesis and lipogenesis leads to hepatic steatosis and attenuation of these pathways contributes to the treatment of NAFLD (221,233-235). The increase in hepatic gluconeogenesis cannot impair glycemic control because SGLT-2 inhibitors increase the urinary excretion of glucose and finally decrease blood glucose level.

SGLT-2 inhibition by empagliflozin attenuated NLRP3 inflammasome activation in the liver of rats (236). NLRP3 inflammasome has a key role in the liver inflammation. Additionally, activation of NLRP3 inflammasome is essential for development of liver fibrosis and possesses a pivotal role in the progression of NAFLD to nonalcoholic steatohepatitis (NASH) (237,238). As mentioned previously, SGLT-2 inhibition significantly downregulates  $\alpha$  smooth muscle actin, TGF- $\beta$ , and collagen 1A1 to improve liver fibrosis in the rat model of NAFLD (239,240). TGF- $\beta$  activates janus kinase 1/signal transducer and activator of transcription 3 signaling pathway, which leads

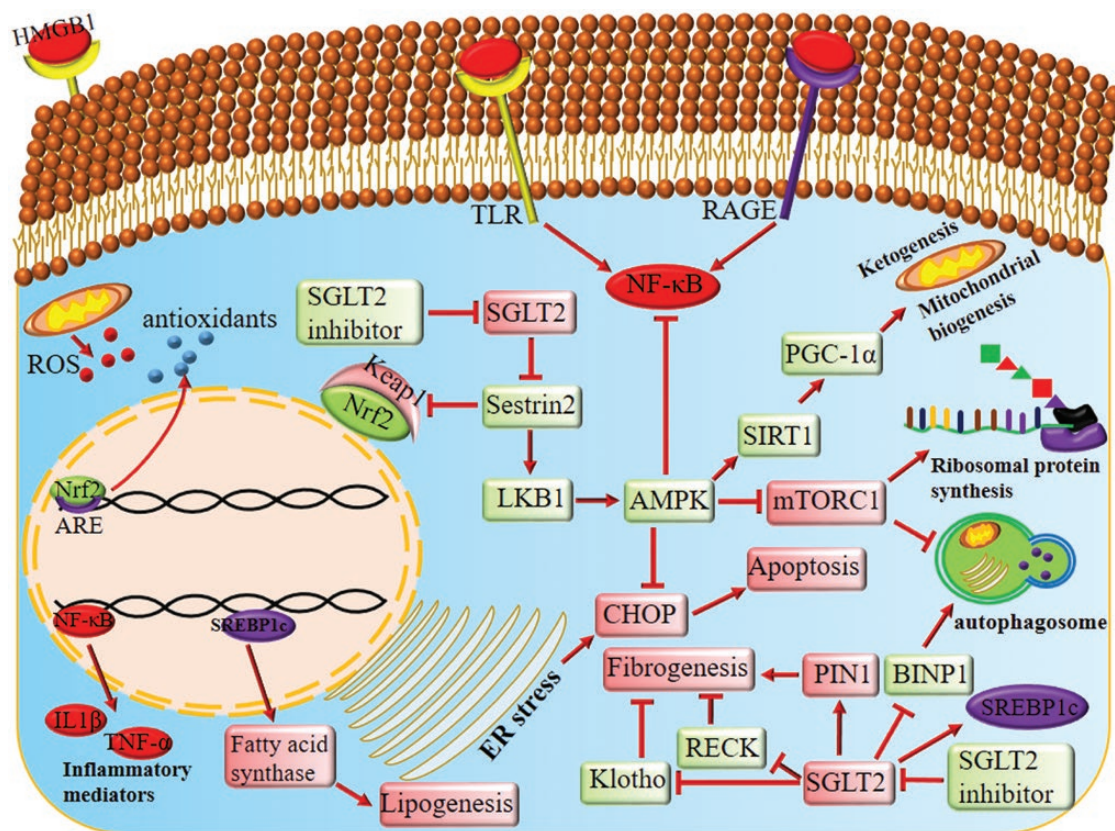

**Figure 5.** The effect of SGLT-2 inhibitors on several intracellular signaling pathways. SGLT-2 inhibitors activate Sestrin2/LKB1/AMPK signaling pathway, thereby regulating several cellular events. AMPK upregulates SIRT1/PGC-1 $\alpha$  to enhance mitochondrial biogenesis. SGLT-2 inhibitors can also downregulate NF- $\kappa$ B, mTORC1 and CHOP. Accordingly, SGLT-2 inhibitors negatively regulate ribosomal protein synthesis, inflammatory cytokines production and ER stress-mediated apoptosis. In addition, SGLT-2 inhibitors increase autophagy by inhibiting mTORC1 and enhancing BINP1 function. These drugs prevent lipogenesis by decreasing SREBP1c. SGLT-2 inhibitors, in a Sestrin2-dependent manner, liberate Nrf2 from Keap1 anchoring and potentiate the production of numerous endogenous antioxidants. Finally, SGLT-2 inhibitors effectively confine fibrogenesis in the damaged organ by upregulating klotho and RECK and suppressing PIN1 expression.

to expression of a group of genes, contributing to liver fibrosis (241).

Twenty-four-week treatment with dapagliflozin reduced the serum levels of soluble DPP-4 in patients with diabetes and NAFLD (242). DPP-4 inhibitors activate AMPK and suppress hepatic lipogenesis to improve NAFLD (243-245). DPP-4 degrades GLP-1 and prevents its beneficial effects on NAFLD (246). Recent meta-analysis performed by Mantovani et al revealed that 26-week treatment with GLP-1 receptor agonists markedly improved liver fat content on magnetic resonance imaging, decreased liver fibrosis in histopathology, and reduced serum aminotransferases in patients with or without diabetes (247).

Ipragliflozin increased the plasma concentration of adiponectin, while it decreased the plasma concentration of leptin and FGF21. It significantly improved oxidative stress, inflammation, and fibrosis in the mice model of NAFLD (248,249). Lower adiponectin/leptin ratio is associated with metabolic syndrome, presence of NAFLD, and severity of NAFLD and liver fibrosis (250,251). Likewise, higher levels of FGF21 are detected in patients with NAFLD (252). Dapagliflozin decreased liver fat content, suppressed

liver inflammation, alleviated hepatocellular injury, and, consequently, reduced the plasma levels of FGF21 and hepatic enzymes in diabetic patients after 8 and 12 weeks of treatment (201,253). However, SGLT-2 inhibitors typically increase FGF21 level (254,255). FGF21 enhances fatty acid oxidation and ketogenesis, attempts to alleviate liver injury, and, as a compensatory mechanism, increases during liver injury (256,257). Decreased levels of FGF21 following administration of dapagliflozin may be due to decreased hepatocellular injury after 8 to 12 weeks, similar to what happened for hepatic enzymes (253).

SGLT-2 inhibitors can slightly increase glucagon secretion and also improve insulin resistance (258,259). It was shown that stimulation of glucagon receptor and GLP-1 receptor can inhibit intrahepatic lipogenesis and mitigate NAFLD (260,261). Similar to SGLT-2 inhibitors, glucagon promotes ketogenesis (103,262). Ketogenic diet decreases body weight, intrahepatic triglyceride accumulation, hepatic insulin resistance, and plasma leptin. In addition, ketogenic diet significantly enhances hepatic mitochondrial redox state (263,264).

Accumulating evidence shows that SGLT-2 inhibitors can partly improve NAFLD. SGLT-2 inhibitors decrease

intrahepatic lipid accumulation. They also prevent the progression of NAFLD to NASH and liver fibrosis by ameliorating liver inflammation and apoptosis of hepatocytes. These effects can be helpful in diabetic patients who are complicated with NAFLD. Future studies should answer whether SGLT-2 inhibitors can improve NAFLD in nondiabetic patients (Fig. 4).

## Conclusion and Future Research Direction

SGLT-2 inhibitors are a new class of antidiabetic drugs that can effectively improve the coexisting conditions of diabetes such as cardiovascular diseases, kidney diseases and NAFLD in diabetic patients. This review article attempted to explain how these drugs can interact with numerous signaling pathways and molecular mechanisms to improve these diseases (Fig. 5). Now, the question is whether we should use SGLT-2 inhibitors for nondiabetic patients who are suffering from these conditions. Another question is whether these drugs effectively improve other diseases that were not addressed or measured in previous human studies. Future studies will answer these questions and expand our knowledge of the biological function of SGLT-2.

## Additional Information

**Correspondence:** Moein Ala, MD, School of Medicine, Tehran University of Medical Sciences (TUMS), Enqelab Square, Tehran, Tehran Province, Iran. E-mail: [moinala75@yahoo.com](mailto:moinala75@yahoo.com).

**Disclosures:** The author declares no conflicts of interest.

**Data Availability:** Data sharing is not applicable to this article as no datasets were generated or analyzed during the current study.

## References

- Corriere M, Rooparinesingh N, Kalyani RR. Epidemiology of diabetes and diabetes complications in the elderly: an emerging public health burden. *Curr Diab Rep*. 2013;13(6):805-813.
- Younossi ZM, Golabi P, de Avila L, et al. The global epidemiology of NAFLD and NASH in patients with type 2 diabetes: a systematic review and meta-analysis. *J Hepatol*. 2019;71(4):793-801.
- Gajos GP. Diabetes and cardiovascular disease: from new mechanisms to new therapies. *Pol Arch Intern Med*. 2018;128(3):178-186.
- Li S, Wang J, Zhang B, Li X, Liu Y. Diabetes mellitus and cause-specific mortality: a population-based study. *Diabetes Metab J*. 2019;43(3):319-341.
- Abdi H, Azizi F, Amouzegar A. Insulin monotherapy versus insulin combined with other glucose-lowering agents in type 2 diabetes: a narrative review. *Int J Endocrinol Metab*. 2018;16(2):e65600.
- He ZX, Zhou ZW, Yang Y, et al. Overview of clinically approved oral antidiabetic agents for the treatment of type 2 diabetes mellitus. *Clin Exp Pharmacol Physiol*. 2015;42(2):125-138.
- Scheen AJ, Paquot N. Metabolic effects of SGLT-2 inhibitors beyond increased glucosuria: a review of the clinical evidence. *Diabetes Metab*. 2014;40(6 suppl 1):S4-S11.
- Fujita Y, Inagaki N. Renal sodium glucose cotransporter 2 inhibitors as a novel therapeutic approach to treatment of type 2 diabetes: clinical data and mechanism of action. *J Diabetes Investig*. 2014;5(3):265-275.
- Sánchez-García A, Simental-Mendía M, Millán-Alanís JM, Simental-Mendía LE. Effect of sodium-glucose co-transporter 2 inhibitors on lipid profile: a systematic review and meta-analysis of 48 randomized controlled trials. *Pharmacol Res*. 2020;160:105068.
- Pinto LC, Rados DV, Remonti LR, Kramer CK, Leitao CB, Gross JL. Efficacy of SGLT2 inhibitors in glycemic control, weight loss and blood pressure reduction: a systematic review and meta-analysis. *Diabetol Metab Syndr*. 2015;7(1):1-2.
- Filippas-Ntekouan S, Tsimihodimos V, Filippatos T, Dimitriou T, Elisaf M. SGLT-2 inhibitors: pharmacokinetics characteristics and effects on lipids. *Expert Opin Drug Metab Toxicol*. 2018;14(11):1113-1121.
- Cai X, Yang W, Gao X, et al. The association between the dosage of SGLT2 inhibitor and weight reduction in type 2 diabetes patients: a meta-analysis. *Obesity*. 2018;26(1):70-80.
- Qiu M, Ding LL, Zhang M, et al. SGLT2 inhibitors for prevention of cardiorenal events in people with type 2 diabetes without cardiorenal disease: a meta-analysis of large randomized trials and cohort studies. *Pharmacol Res*. 2020;161:105175.
- Qiu M, Liu S-Y, Gu J-S, Li K-K, Li L-L, Ding L-L. Do reductions in risk of cardiorenal events with SGLT2 inhibitors in type 2 diabetes vary with baseline characteristics? A meta-analysis. *Endocrine*. 2020;69(3):688-691.
- Zelniker TA, Wiviott SD, Raz I, et al. SGLT2 inhibitors for primary and secondary prevention of cardiovascular and renal outcomes in type 2 diabetes: a systematic review and meta-analysis of cardiovascular outcome trials. *Lancet*. 2019;393(10166):31-39.
- Xing B, Zhao Y, Dong B, Zhou Y, Lv W, Zhao W. Effects of sodium-glucose cotransporter 2 inhibitors on non-alcoholic fatty liver disease in patients with type 2 diabetes: a meta-analysis of randomized controlled trials. *J Diabetes Investig*. 2020;11(5):1238-1247.
- Shao S-C, Kuo L-T, Chien R-N, Hung M-J, Lai EC-C. SGLT2 inhibitors in patients with type 2 diabetes with non-alcoholic fatty liver diseases: an umbrella review of systematic reviews. *BMJ Open Diabetes Res Care*. 2020;8(2):e001956.
- Scheen AJ. Cardiovascular effects of new oral glucose-lowering agents: DPP-4 and SGLT-2 inhibitors. *Circ Res*. 2018;122(10):1439-1459.
- Verma S, McMurray JJV. SGLT2 inhibitors and mechanisms of cardiovascular benefit: a state-of-the-art review. *Diabetologia*. 2018;61(10):2108-2117.
- Dekkers CCJ, Gansevoort RT, Heerspink HJL. New diabetes therapies and diabetic kidney disease progression: the role of SGLT-2 inhibitors. *Curr Diab Rep*. 2018;18(5):27.
- Woo V, Connelly K, Lin P, McFarlane P. The role of sodium glucose cotransporter-2 (SGLT-2) inhibitors in heart failure and chronic kidney disease in type 2 diabetes. *Curr Med Res Opin*. 2019;35(7):1283-1295.
- Heerspink HJ, Perkins BA, Fitchett DH, Husain M, Cherney DZ. Sodium glucose Cotransporter 2 inhibitors in the treatment of diabetes mellitus: cardiovascular and kidney effects, potential mechanisms, and clinical applications. *Circulation*. 2016;134(10):752-772.

23. Zelniker TA, Braunwald E. Mechanisms of cardiorenal effects of sodium-glucose cotransporter 2 inhibitors: JACC state-of-the-art review. *J Am Coll Cardiol*. 2020;75(4):422-434.
24. Ranjbar G, Mikhailidis DP, Sahebkar A. Effects of newer antidiabetic drugs on nonalcoholic fatty liver and steatohepatitis: think out of the box! *Metabolism*. 2019;101:154001.
25. Wright EM, Loo DD, Hirayama BA. Biology of human sodium glucose transporters. *Physiol Rev*. 2011;91(2):733-794.
26. Liu JJ, Lee T, DeFronzo RA. Why Do SGLT2 inhibitors inhibit only 30-50% of renal glucose reabsorption in humans? *Diabetes*. 2012;61(9):2199-2204.
27. Yang Y, Chen S, Pan H, et al. Safety and efficiency of SGLT2 inhibitor combining with insulin in subjects with diabetes: systematic review and meta-analysis of randomized controlled trials. *Medicine*. 2017;96(21):e6944.
28. Rao L, Ren C, Luo S, Huang C, Li X. Sodium-glucose cotransporter 2 inhibitors as an add-on therapy to insulin for type 1 diabetes mellitus: meta-analysis of randomized controlled trials. *Acta Diabetol*. 2021;58(7):869-880.
29. Tang HL, Li D, Zhang J, et al. Lack of evidence for a harmful effect of sodium-glucose co-transporter 2 (SGLT2) inhibitors on fracture risk among type 2 diabetes patients: a network and cumulative meta-analysis of randomized controlled trials. *Diabetes Obes Metab*. 2016;18(12):1199-1206.
30. Monami M, Nreu B, Zannoni S, Lualdi C, Mannucci E. Effects of SGLT-2 inhibitors on diabetic ketoacidosis: a meta-analysis of randomised controlled trials. *Diabetes Res Clin Pract*. 2017;130:53-60.
31. Huang CY, Lee JK. Sodium-glucose co-transporter-2 inhibitors and major adverse limb events: a trial-level meta-analysis including 51 713 individuals. *Diabetes Obes Metab*. 2020;22(12):2348-2355.
32. Puckrin R, Saltiel MP, Reynier P, Azoulay L, Yu OHY, Filion KB. SGLT-2 inhibitors and the risk of infections: a systematic review and meta-analysis of randomized controlled trials. *Acta Diabetol*. 2018;55(5):503-514.
33. Shah AD, Langenberg C, Rapsomaniki E, et al. Type 2 diabetes and incidence of cardiovascular diseases: a cohort study in 19 million people. *Lancet Diabetes Endocrinol*. 2015;3(2):105-113.
34. Tanaka S, Yoshimura Y, Kamada C, et al; Japan Diabetes Complications Study Group. Intakes of dietary fiber, vegetables, and fruits and incidence of cardiovascular disease in Japanese patients with type 2 diabetes. *Diabetes Care*. 2013;36(12):3916-3922.
35. Zheng SL, Roddick AJ, Aghar-Jaffar R, et al. Association between use of sodium-glucose cotransporter 2 inhibitors, glucagon-like peptide 1 agonists, and dipeptidyl peptidase 4 inhibitors with all-cause mortality in patients with type 2 diabetes: a systematic review and meta-analysis. *JAMA*. 2018;319(15):1580-1591.
36. Monami M, Dicembrini I, Mannucci E. Effects of SGLT-2 inhibitors on mortality and cardiovascular events: a comprehensive meta-analysis of randomized controlled trials. *Acta Diabetol*. 2017;54(1):19-36.
37. Toyama T, Neuen BL, Jun M, et al. Effect of SGLT2 inhibitors on cardiovascular, renal and safety outcomes in patients with type 2 diabetes mellitus and chronic kidney disease: a systematic review and meta-analysis. *Diabetes Obes Metab*. 2019;21(5):1237-1250.
38. Zannad F, Ferreira JP, Pocock SJ, et al. SGLT2 inhibitors in patients with heart failure with reduced ejection fraction: a meta-analysis of the EMPEROR-reduced and DAPA-HF trials. *Lancet*. 2020;396(10254):819-829.
39. Butler J, Usman MS, Khan MS, et al. Efficacy and safety of SGLT2 inhibitors in heart failure: systematic review and meta-analysis. *ESC Heart Fail*. 2020;7(6):3298-3309.
40. Malik AH, Yandrapalli S, Goldberg M, Jain D, Frishman WH, Aronow WS. Cardiovascular outcomes with the use of sodium-glucose cotransporter-2 inhibitors in patients with type 2 diabetes and chronic kidney disease: an updated meta-analysis of randomized controlled trials. *Cardiol Rev*. 2020;28(3):116-124.
41. Friedrichsen M, Breitschaft A, Tadayon S, Wizert A, Skovgaard D. The effect of semaglutide 2.4 mg once weekly on energy intake, appetite, control of eating, and gastric emptying in adults with obesity. *Diabetes Obes Metab*. 2021;23(3):754-762.
42. Fei Y, Tsoi MF, Kumana CR, Cheung TT, Cheung BMY. Network meta-analysis of cardiovascular outcomes in randomized controlled trials of new antidiabetic drugs. *Int J Cardiol*. 2018;254:291-296.
43. Yamada T, Wakabayashi M, Bhalla A, et al. Cardiovascular and renal outcomes with SGLT-2 inhibitors versus GLP-1 receptor agonists in patients with type 2 diabetes mellitus and chronic kidney disease: a systematic review and network meta-analysis. *Cardiovasc Diabetol*. 2021;20(1):14.
44. Mazidi M, Rezaie P, Gao HK, Kengne AP. Effect of sodium-glucose cotransport-2 inhibitors on blood pressure in people with type 2 diabetes mellitus: a systematic review and meta-analysis of 43 randomized control trials with 22 528 patients. *J Am Heart Assoc*. 2017;6(6):e004007.
45. Georgianos PI, Agarwal R. Ambulatory blood pressure reduction with SGLT-2 inhibitors: dose-response meta-analysis and comparative evaluation with low-dose hydrochlorothiazide. *Diabetes Care*. 2019;42(4):693-700.
46. Fitchett D, Zinman B, Wanner C, et al; EMPA-REG OUTCOME® trial investigators. Heart failure outcomes with empagliflozin in patients with type 2 diabetes at high cardiovascular risk: results of the EMPA-REG OUTCOME® trial. *Eur Heart J*. 2016;37(19):1526-1534.
47. Mahaffey KW, Neal B, Perkovic V, et al; CANVAS Program Collaborative Group. Canagliflozin for primary and secondary prevention of cardiovascular events: results from the CANVAS program (Canagliflozin Cardiovascular Assessment Study). *Circulation*. 2018;137(4):323-334.
48. Furtado RHM, Bonaca MP, Raz I, et al. Dapagliflozin and cardiovascular outcomes in patients with type 2 diabetes mellitus and previous myocardial infarction. *Circulation*. 2019;139(22):2516-2527.
49. Cosentino F, Cannon CP, Cherney DZI, et al; VERTIS CV Investigators. Efficacy of ertugliflozin on heart failure-related events in patients with type 2 diabetes mellitus and established atherosclerotic cardiovascular disease: results of the VERTIS CV trial. *Circulation*. 2020;142(23):2205-2215.
50. McGuire DK, Shih WJ, Cosentino F, et al. Association of SGLT2 inhibitors with cardiovascular and kidney outcomes in patients with type 2 diabetes: a meta-analysis. *JAMA Cardiol*. 2021;6(2):148-158.
51. Lee PC, Ganguly S, Goh SY. Weight loss associated with sodium-glucose cotransporter-2 inhibition: a review of evidence and underlying mechanisms. *Obes Rev*. 2018;19(12):1630-1641.
52. Yokono M, Takasu T, Hayashizaki Y, et al. SGLT2 selective inhibitor ipragliflozin reduces body fat mass by increasing

- fatty acid oxidation in high-fat diet-induced obese rats. *Eur J Pharmacol.* 2014;727:66-74.
53. Tahara A, Kondo Y, Takasu T, Tomiyama H. Effects of the SGLT2 inhibitor ipragliflozin on food intake, appetite-regulating hormones, and arteriovenous differences in postprandial glucose levels in type 2 diabetic rats. *Biomed Pharmacother.* 2018;105:1033-1041.
  54. Park S, Komatsu T, Kim SE, et al. Neuropeptide Y resists excess loss of fat by lipolysis in calorie-restricted mice: a trait potential for the life-extending effect of calorie restriction. *Aging Cell.* 2017;16(2):339-348.
  55. Schalla MA, Stengel A. Pharmacological modulation of ghrelin to induce weight loss: successes and challenges. *Curr Diab Rep.* 2019;19(10):102.
  56. Weeks KL, Bernardo BC, Ooi JYY, Patterson NL, McMullen JR. The IGF1-PI3K-Akt signaling pathway in mediating exercise-induced cardiac hypertrophy and protection. *Adv Exp Med Biol.* 2017;1000:187-210.
  57. Packer M. Potentiation of insulin signaling contributes to heart failure in type 2 diabetes: a hypothesis supported by both mechanistic studies and clinical trials. *JACC: Basic Transl Sci.* 2018;3(3):415-419.
  58. Radlinger B, Hornsteiner F, Folie S, et al. Cardioprotective effects of short-term empagliflozin treatment in db/db mice. *Sci Rep.* 2020;10(1):19686.
  59. Chaanine AH, Hajjar RJ. AKT signalling in the failing heart. *Eur J Heart Fail.* 2011;13(8):825-829.
  60. Sun X, Han F, Lu Q, et al. Empagliflozin ameliorates obesity-related cardiac dysfunction by regulating Sestrin2-mediated AMPK-mTOR signaling and redox homeostasis in high-fat diet-induced obese mice. *Diabetes.* 2020;69(6):1292-1305.
  61. Li X, Liu J, Ren D, Zhang J, Han Y, Li J. Empagliflozin improves heart failure caused by pressure overload by regulating cardiac metabolism. *Circulation.* 2019;140(suppl 1):A10294.
  62. Kishimoto Y, Kondo K, Momiyama Y. The protective role of Sestrin2 in atherosclerotic and cardiac diseases. *Int J Mol Sci.* 2021;22(3):1200.
  63. Tripathi DN, Chowdhury R, Trudel LJ, et al. Reactive nitrogen species regulate autophagy through ATM-AMPK-TSC2-mediated suppression of mTORC1. *Proc Natl Acad Sci U S A.* 2013;110(32):E2950-E2957.
  64. Lu Q, Liu J, Li X, et al. Empagliflozin attenuates ischemia and reperfusion injury through LKB1/AMPK signaling pathway. *Mol Cell Endocrinol.* 2020;501:110642.
  65. Morrison A, Chen L, Wang J, et al. Sestrin2 promotes LKB1-mediated AMPK activation in the ischemic heart. *FASEB J.* 2015;29(2):408-417.
  66. Kim GE, Ross JL, Xie C, et al. LKB1 deletion causes early changes in atrial channel expression and electrophysiology prior to atrial fibrillation. *Cardiovasc Res.* 2015;108(1):197-208.
  67. Kim JS, Ro S-H, Kim M, et al. Sestrin2 inhibits mTORC1 through modulation of GATOR complexes. *Sci Rep.* 2015;5(1):1-10.
  68. Suryawan A, Davis TA. Amino acid- and insulin-induced activation of mTORC1 in neonatal piglet skeletal muscle involves Sestrin2-GATOR2, Rag A/C-mTOR, and RHEB-mTOR complex formation. *J Nutr.* 2018;148(6):825-833.
  69. Wang F, Jia J, Rodrigues B. Autophagy, metabolic disease, and pathogenesis of heart dysfunction. *Can J Cardiol.* 2017;33(7):850-859.
  70. Li Y, Chen C, Yao F, et al. AMPK inhibits cardiac hypertrophy by promoting autophagy via mTORC1. *Arch Biochem Biophys.* 2014;558:79-86.
  71. Kanamori H, Takemura G, Goto K, et al. Autophagy limits acute myocardial infarction induced by permanent coronary artery occlusion. *Am J Physiol Heart Circ Physiol.* 2011;300(6):H2261-H2271.
  72. Wu X, He L, Chen F, et al. Impaired autophagy contributes to adverse cardiac remodeling in acute myocardial infarction. *PLoS One.* 2014;9(11):e112891.
  73. Zhang WY, Wang J, Li AZ. A study of the effects of SGLT-2 inhibitors on diabetic cardiomyopathy through miR-30d/KLF9/VEGFA pathway. *Eur Rev Med Pharmacol Sci.* 2020;24(11):6346-6359.
  74. Ma L, Li Z, Li W, Ai J, Chen X. MicroRNA-142-3p suppresses endometriosis by regulating KLF9-mediated autophagy in vitro and in vivo. *RNA Biol.* 2019;16(12):1733-1748.
  75. Mizuno M, Kuno A, Yano T, et al. Empagliflozin normalizes the size and number of mitochondria and prevents reduction in mitochondrial size after myocardial infarction in diabetic hearts. *Physiol Rep.* 2018;6(12):e13741.
  76. Zhou B, Tian R. Mitochondrial dysfunction in pathophysiology of heart failure. *J Clin Invest.* 2018;128(9):3716-3726.
  77. Paradies G, Paradies V, Ruggiero FM, Petrosillo G. Mitochondrial bioenergetics and cardiolipin alterations in myocardial ischemia-reperfusion injury: implications for pharmacological cardioprotection. *Am J Physiol Heart Circ Physiol.* 2018;315(5):H1341-H1352.
  78. Hamilton S, Terentyev D. Altered intracellular calcium homeostasis and arrhythmogenesis in the aged heart. *Int J Mol Sci.* 2019;20(10):2386.
  79. Baartscheer A, Schumacher CA, Wüst RC, et al. Empagliflozin decreases myocardial cytoplasmic Na<sup>+</sup> through inhibition of the cardiac Na<sup>+</sup>/H<sup>+</sup> exchanger in rats and rabbits. *Diabetologia.* 2017;60(3):568-573.
  80. Liu T, Takimoto E, Dimaano VL, et al. Inhibiting mitochondrial Na<sup>+</sup>/Ca<sup>2+</sup> exchange prevents sudden death in a Guinea pig model of heart failure. *Circ Res.* 2014;115(1):44-54.
  81. Baartscheer A, Schumacher CA, van Borren MM, Belterman CN, Coronel R, Fiolet JW. Increased Na<sup>+</sup>/H<sup>+</sup>-exchange activity is the cause of increased [Na<sup>+</sup>]<sub>i</sub> and underlies disturbed calcium handling in the rabbit pressure and volume overload heart failure model. *Cardiovasc Res.* 2003;57(4):1015-1024.
  82. Bode D, Semmler L, Wakula P, et al. Dual SGLT-1 and SGLT-2 inhibition improves left atrial dysfunction in HFpEF. *Cardiovasc Diabetol.* 2021;20(1):7.
  83. Ye Y, Jia X, Bajaj M, Birnbaum Y. Dapagliflozin attenuates Na<sup>+</sup>/H<sup>+</sup> exchanger-1 in cardiofibroblasts via AMPK activation. *Cardiovasc Drugs Ther.* 2018;32(6):553-558.
  84. Quan N, Wang L, Chen X, et al. Sestrin2 prevents age-related intolerance to post myocardial infarction via AMPK/PGC-1 $\alpha$  pathway. *J Mol Cell Cardiol.* 2018;115:170-178.
  85. van der Pluijm I, Burger J, van Heijningen PM, et al. Decreased mitochondrial respiration in aneurysmal aortas of Fibulin-4 mutant mice is linked to PGC1A regulation. *Cardiovasc Res.* 2018;114(13):1776-1793.
  86. Shao Q, Meng L, Lee S, et al. Empagliflozin, a sodium glucose co-transporter-2 inhibitor, alleviates atrial remodeling and improves mitochondrial function in high-fat diet/streptozotocin-induced diabetic rats. *Cardiovasc Diabetol.* 2019;18(1):165.

87. Feng H, Wang JY, Yu B, et al. Peroxisome proliferator-activated receptor- $\gamma$  coactivator-1 $\alpha$  inhibits vascular calcification through Sirtuin 3-mediated reduction of mitochondrial oxidative stress. *Antioxid Redox Signal*. 2019;31(1):75-91.
88. Schafer C, Moore V, Dasgupta N, et al. The effects of PPAR stimulation on cardiac metabolic pathways in Barth syndrome mice. *Front Pharmacol*. 2018;9:318.
89. Chistiakov DA, Shkurat TP, Melnichenko AA, Grechko AV, Orekhov AN. The role of mitochondrial dysfunction in cardiovascular disease: a brief review. *Ann Med*. 2018;50(2):121-127.
90. Rhee SG, Bae SH. The antioxidant function of sestrins is mediated by promotion of autophagic degradation of Keap1 and Nrf2 activation and by inhibition of mTORC1. *Free Radic Biol Med*. 2015;88(Pt B):205-211.
91. Oshima H, Miki T, Kuno A, et al. Empagliflozin, an SGLT2 inhibitor, reduced the mortality rate after acute myocardial infarction with modification of cardiac metabolomes and antioxidants in diabetic rats. *J Pharmacol Exp Ther*. 2019;368(3):524-534.
92. Andreadou I, Bell RM, Bøtker HE, Zuurbier CJ. SGLT2 inhibitors reduce infarct size in reperfused ischemic heart and improve cardiac function during ischemic episodes in preclinical models. *Biochim Biophys Acta Mol Basis Dis*. 2020;1866(7):165770.
93. Lee Y, Lee HY, Hanna RA, Gustafsson ÅB. Mitochondrial autophagy by Bnip3 involves Drp1-mediated mitochondrial fission and recruitment of Parkin in cardiac myocytes. *Am J Physiol Heart Circ Physiol*. 2011;301(5):H1924-H1931.
94. Joshi AU, Ebert AE, Haileselassie B, Mochly-Rosen D. Drp1/Fis1-mediated mitochondrial fragmentation leads to lysosomal dysfunction in cardiac models of Huntington's disease. *J Mol Cell Cardiol*. 2019;127:125-133.
95. Lahnwong S, Palee S, Apaijai N, et al. Acute dapagliflozin administration exerts cardioprotective effects in rats with cardiac ischemia/reperfusion injury. *Cardiovasc Diabetol*. 2020;19(1):91.
96. Kang D, Kim SH, Hamasaki N. Mitochondrial transcription factor A (TFAM): roles in maintenance of mtDNA and cellular functions. *Mitochondrion*. 2007;7(1-2):39-44.
97. Kitakaze M, Tsukamoto O. What is the role of ER stress in the heart? Introduction and series overview. *Circ Res*. 2010;107(1):15-18.
98. Yao Y, Lu Q, Hu Z, Yu Y, Chen Q, Wang QK. A non-canonical pathway regulates ER stress signaling and blocks ER stress-induced apoptosis and heart failure. *Nat Commun*. 2017;8(1):1-15.
99. Zhou Y, Wu W. The sodium-glucose co-transporter 2 inhibitor, empagliflozin, protects against diabetic cardiomyopathy by inhibition of the endoplasmic reticulum stress pathway. *Cell Physiol Biochem*. 2017;41(6):2503-2512.
100. Mungrue IN, Pagnon J, Kohannim O, Gargalovic PS, Lusis AJ. CHAC1/MGC4504 is a novel proapoptotic component of the unfolded protein response, downstream of the ATF4-ATF3-CHOP cascade. *J Immunol*. 2009;182(1):466-476.
101. Zhang C, Syed TW, Liu R, Yu J. Role of endoplasmic reticulum stress, autophagy, and inflammation in cardiovascular disease. *Front Cardiovasc Med*. 2017;4:29.
102. Dong G, Liu Y, Zhang L, Huang S, Ding HF, Dong Z. mTOR contributes to ER stress and associated apoptosis in renal tubular cells. *Am J Physiol Renal Physiol*. 2015;308(3):F267-F274.
103. Ekanayake P, Hupfeld C, Mudaliar S. Sodium-glucose cotransporter type 2 (SGLT-2) inhibitors and ketogenesis: the good and the bad. *Curr Diab Rep*. 2020;20(12):74.
104. Burke KR, Schumacher CA, Harpe SE. SGLT2 inhibitors: a systematic review of diabetic ketoacidosis and related risk factors in the primary literature. *Pharmacotherapy*. 2017;37(2):187-194.
105. Al-Zaid NS, Dashti HM, Mathew TC, Juggi JS. Low carbohydrate ketogenic diet enhances cardiac tolerance to global ischaemia. *Acta Cardiol*. 2007;62(4):381-389.
106. Guo Y, Zhang C, Shang FF, et al. Ketogenic diet ameliorates cardiac dysfunction via balancing mitochondrial dynamics and inhibiting apoptosis in type 2 diabetic mice. *Aging Dis*. 2020;11(2):229-240.
107. Yu Y, Wang F, Wang J, Zhang D, Zhao X. Ketogenic diet attenuates aging-associated myocardial remodeling and dysfunction in mice. *Exp Gerontol*. 2020;140:111058.
108. Whalen C, Mattie F, Bach E, et al. A ketogenic diet is protective against atherosclerosis in apolipoprotein E knockout mice. *Curr Dev Nutr*. 2020;4(suppl 2):87.
109. Choi YJ, Jeon S-M, Shin S. Impact of a ketogenic diet on metabolic parameters in patients with obesity or overweight and with or without type 2 diabetes: a meta-analysis of randomized controlled trials. *Nutrients*. 2020;12(7):2005.
110. Yuan X, Wang J, Yang S, et al. Effect of the ketogenic diet on glycemic control, insulin resistance, and lipid metabolism in patients with T2DM: a systematic review and meta-analysis. *Nutr Diabetes*. 2020;10(1):38.
111. Packer M. Cardioprotective effects of Sirtuin-1 and its downstream effectors: potential role in mediating the heart failure benefits of SGLT2 (Sodium-Glucose Cotransporter 2) inhibitors. *Circ Heart Fail*. 2020;13(9):e007197.
112. McCarty MF, DiNicolantonio JJ, O'Keefe JH. Ketosis may promote brain macroautophagy by activating Sirt1 and hypoxia-inducible factor-1. *Med Hypotheses*. 2015;85(5):631-639.
113. Yang X, Liu Q, Li Y, et al. The diabetes medication canagliflozin promotes mitochondrial remodelling of adipocyte via the AMPK-Sirt1-Pgc-1 $\alpha$  signalling pathway. *Adipocyte*. 2020;9(1):484-494.
114. Koyani CN, Plastira I, Sourij H, et al. Empagliflozin protects heart from inflammation and energy depletion via AMPK activation. *Pharmacol Res*. 2020;158:104870.
115. Oelze M, Kröller-Schön S, Welschof P, et al. The sodium-glucose co-transporter 2 inhibitor empagliflozin improves diabetes-induced vascular dysfunction in the streptozotocin diabetes rat model by interfering with oxidative stress and glucotoxicity. *PLoS One*. 2014;9(11):e112394.
116. Leng W, Ouyang X, Lei X, et al. The SGLT-2 inhibitor dapagliflozin has a therapeutic effect on atherosclerosis in diabetic ApoE $^{-/-}$  mice. *Mediators Inflamm*. 2016;2016:6305735.
117. Quagliarriello V, De Laurentis M, Rea D, et al. The SGLT-2 inhibitor empagliflozin improves myocardial strain, reduces cardiac fibrosis and pro-inflammatory cytokines in non-diabetic mice treated with doxorubicin. *Cardiovasc Diabetol*. 2021;20(1):150.
118. Ye Y, Bajaj M, Yang HC, Perez-Polo JR, Birnbaum Y. SGLT-2 inhibition with dapagliflozin reduces the activation of the Nlrp3/ASC inflammasome and attenuates the development of diabetic cardiomyopathy in mice with type 2 diabetes. further



- augmentation of the effects with Saxagliptin, a DPP4 inhibitor. *Cardiovasc Drugs Ther.* 2017;**31**(2):119-132.
119. Dimitriadis GK, Nasiri-Ansari N, Agrogiannis G, et al. Empagliflozin improves primary haemodynamic parameters and attenuates the development of atherosclerosis in high fat diet fed APOE knockout mice. *Mol Cell Endocrinol.* 2019;**494**:110487.
  120. Baldrighi M, Mallat Z, Li X. NLRP3 inflammasome pathways in atherosclerosis. *Atherosclerosis.* 2017;**267**:127-138.
  121. Lee SG, Lee SJ, Lee JJ, et al. Anti-inflammatory effect for atherosclerosis progression by sodium-glucose cotransporter 2 (SGLT-2) inhibitor in a normoglycemic rabbit model. *Korean Circ J.* 2020;**50**(5):443-457.
  122. Lou X, Yu Z, Yang X, Chen J. Protective effect of rivaroxaban on arteriosclerosis obliterans in rats through modulation of the toll-like receptor 4/NF- $\kappa$ B signaling pathway. *Exp Ther Med.* 2019;**18**(3):1619-1626.
  123. Hwang HJ, Jung TW, Choi JH, et al. Knockdown of sestrin2 increases pro-inflammatory reactions and ER stress in the endothelium via an AMPK dependent mechanism. *Biochim Biophys Acta Mol Basis Dis.* 2017;**1863**(6):1436-1444.
  124. Sundararajan S, Jayachandran I, Balasubramanyam M, Mohan V, Venkatesan B, Manickam N. Sestrin2 regulates monocyte activation through AMPK-mTOR nexus under high-glucose and dyslipidemic conditions. *J Cell Biochem.* 2019;**120**(5):8201-8213.
  125. He T, Li W, Song Y, et al. Sestrin2 regulates microglia polarization through mTOR-mediated autophagic flux to attenuate inflammation during experimental brain ischemia. *J Neuroinflammation.* 2020;**17**(1):329.
  126. Liao X, Sluimer JC, Wang Y, et al. Macrophage autophagy plays a protective role in advanced atherosclerosis. *Cell Metab.* 2012;**15**(4):545-553.
  127. Chinetti-Gbaguidi G, Colin S, Staels B. Macrophage subsets in atherosclerosis. *Nat Rev Cardiol.* 2015;**12**(1):10-17.
  128. Younis F, Leor J, Abassi Z, et al. Beneficial effect of the SGLT2 inhibitor empagliflozin on glucose homeostasis and cardiovascular parameters in the cohen rosenthal diabetic hypertensive (CRDH) Rat. *J Cardiovasc Pharmacol Ther.* 2018;**23**(4):358-371.
  129. Rosenstock J, Jelaska A, Zeller C, Kim G, Broedl U, Woerle H, Investigators ERBt. Impact of empagliflozin added on to basal insulin in type 2 diabetes inadequately controlled on basal insulin: a 78-week randomized, double-blind, placebo-controlled trial. *Diabetes Obes Metab.* 2015;**17**(10):936-948.
  130. Kojima N, Williams JM, Takahashi T, Miyata N, Roman RJ. Effects of a new SGLT2 inhibitor, luseogliflozin, on diabetic nephropathy in T2DN rats. *J Pharmacol Exp Ther.* 2013;**345**(3):464-472.
  131. Wan N, Fujisawa Y, Kobara H, et al. Effects of an SGLT2 inhibitor on the salt sensitivity of blood pressure and sympathetic nerve activity in a nondiabetic rat model of chronic kidney disease. *Hypertens Res.* 2020;**43**(6):492-499.
  132. Takeshige Y, Fujisawa Y, Rahman A, et al. A sodium-glucose co-transporter 2 inhibitor empagliflozin prevents abnormality of circadian rhythm of blood pressure in salt-treated obese rats. *Hypertens Res.* 2016;**39**(6):415-422.
  133. Rahman A, Fujisawa Y, Nakano D, Hitomi H, Nishiyama A. Effect of a selective SGLT 2 inhibitor, luseogliflozin, on circadian rhythm of sympathetic nervous function and locomotor activities in metabolic syndrome rats. *Clin Exp Pharmacol.* 2017;**44**(4):522-525.
  134. Yoshikawa T, Kishi T, Shinohara K, et al. Arterial pressure lability is improved by sodium-glucose cotransporter 2 inhibitor in streptozotocin-induced diabetic rats. *Hypertens Res.* 2017;**40**(7):646-651.
  135. Miyata KN, Lo CS, Zhao S, et al. Angiotensin II up-regulates sodium-glucose co-transporter 2 expression and SGLT2 inhibitor attenuates Ang II-induced hypertensive renal injury in mice. *Clin Sci (Lond).* 2021;**135**(7):943-961.
  136. Hall JE, do Carmo JM, da Silva AA, Wang Z, Hall ME. Obesity, kidney dysfunction and hypertension: mechanistic links. *Nat Rev Nephrol.* 2019;**15**(6):367-385.
  137. Maqbool M, Cooper ME, Jandeleit-Dahm KAM. Cardiovascular disease and diabetic kidney disease. *Semin Nephrol.* 2018;**38**(3):217-232.
  138. Schork A, Saynisch J, Vosseler A, et al. Effect of SGLT2 inhibitors on body composition, fluid status and renin-angiotensin-aldosterone system in type 2 diabetes: a prospective study using bioimpedance spectroscopy. *Cardiovasc Diabetol.* 2019;**18**(1):46.
  139. Quagliariello V, De Laurentis M, Rea D, et al. The SGLT-2 inhibitor empagliflozin improves myocardial strain, reduces cardiac fibrosis and pro-inflammatory cytokines in non-diabetic mice treated with doxorubicin. *Cardiovasc Diabetol.* 2021;**20**(1):150.
  140. Pelliccia F, Limongelli G, Rosano GMC, et al. Nuclear factor-kappa B predicts long-term clinical outcome in patients with hypertrophic cardiomyopathy: 10-year follow-up study. *Eur J Prev Cardiol.* Published online March 24, 2021. doi:[10.1093/eurjpc/zwab047](https://doi.org/10.1093/eurjpc/zwab047)
  141. Liu G, Zhang H, Hao F, et al. Clusterin reduces cold ischemia-reperfusion injury in heart transplantation through regulation of NF- $\kappa$ B signaling and Bax/Bcl-xL expression. *Cell Physiol Biochem.* 2018;**45**(3):1003-1012.
  142. Chekalina N, Burmak Y, Petrov Y, et al. Quercetin reduces the transcriptional activity of NF- $\kappa$ B in stable coronary artery disease. *Indian Heart J.* 2018;**70**(5):593-597.
  143. Bracey NA, Beck PL, Muruve DA, et al. The Nlrp3 inflammasome promotes myocardial dysfunction in structural cardiomyopathy through interleukin-1 $\beta$ . *Exp Physiol.* 2013;**98**(2):462-472.
  144. Luo B, Li B, Wang W, et al. NLRP3 gene silencing ameliorates diabetic cardiomyopathy in a type 2 diabetes rat model. *PLoS One.* 2014;**9**(8):e104771.
  145. Siddesha JM, Valente AJ, Sakamuri SS, et al. Angiotensin II stimulates cardiac fibroblast migration via the differential regulation of matrixins and RECK. *J Mol Cell Cardiol.* 2013;**65**:9-18.
  146. Siddesha JM, Valente AJ, Sakamuri SS, et al. Acetylsalicylic acid inhibits IL-18-induced cardiac fibroblast migration through the induction of RECK. *J Cell Physiol.* 2014;**229**(7):845-855.
  147. McGuire DK, Shih WJ, Cosentino F, et al. Association of SGLT2 inhibitors with cardiovascular and kidney outcomes in patients with type 2 diabetes: a meta-analysis. *JAMA Cardiol.* 2021;**6**(2):148-158.
  148. Bae JH, Park EG, Kim S, Kim SG, Hahn S, Kim NH. Effects of sodium-glucose Cotransporter 2 inhibitors on renal outcomes in patients with type 2 diabetes: a systematic review

- and meta-analysis of randomized controlled trials. *Sci Rep.* 2019;9(1):13009.
149. Menne J, Dumann E, Haller H, Schmidt BMW. Acute kidney injury and adverse renal events in patients receiving SGLT2-inhibitors: a systematic review and meta-analysis. *PloS Med.* 2019;16(12):e1002983.
  150. Kohan DE, Fioretto P, Tang W, List JF. Long-term study of patients with type 2 diabetes and moderate renal impairment shows that dapagliflozin reduces weight and blood pressure but does not improve glycemic control. *Kidney Int.* 2014;85(4):962-971.
  151. Søfteland E, Meier JJ, Vangen B, Toorawa R, Maldonado-Lutomirsky M, Broedl UC. Empagliflozin as add-on therapy in patients with type 2 diabetes inadequately controlled with linagliptin and metformin: a 24-week randomized, double-blind, parallel-group trial. *Diabetes Care.* 2017;40(2):201-209.
  152. Lu CH, Min KW, Chuang LM, Kokubo S, Yoshida S, Cha BS. Efficacy, safety, and tolerability of ipragliflozin in Asian patients with type 2 diabetes mellitus and inadequate glycemic control with metformin: results of a phase 3 randomized, placebo-controlled, double-blind, multicenter trial. *J Diabetes Investig.* 2016;7(3):366-373.
  153. Cefalu WT, Leiter LA, Yoon KH, et al. Efficacy and safety of canagliflozin versus glimepiride in patients with type 2 diabetes inadequately controlled with metformin (CANTATA-SU): 52 week results from a randomised, double-blind, phase 3 non-inferiority trial. *Lancet.* 2013;382(9896):941-950.
  154. Reidy K, Kang HM, Hostetter T, Susztak K. Molecular mechanisms of diabetic kidney disease. *J Clin Invest.* 2014;124(6):2333-2340.
  155. Freitas HS, Anhê GF, Melo KF, et al. Na(+)-glucose transporter-2 messenger ribonucleic acid expression in kidney of diabetic rats correlates with glycemic levels: involvement of hepatocyte nuclear factor-1alpha expression and activity. *Endocrinology.* 2008;149(2):717-724.
  156. Yao D, Wang S, Wang M, Lu W. Renoprotection of dapagliflozin in human renal proximal tubular cells via the inhibition of the high mobility group box 1-receptor for advanced glycation end products-nuclear factor-κB signaling pathway. *Mol Med Rep.* 2018;18(4):3625-3630.
  157. Ishibashi Y, Matsui T, Yamagishi S. Tofogliflozin, a highly selective inhibitor of SGLT2 blocks proinflammatory and proapoptotic effects of glucose overload on proximal tubular cells partly by suppressing oxidative stress generation. *Horm Metab Res.* 2016;48(3):191-195.
  158. Lee YH, Kim SH, Kang JM, et al. Empagliflozin attenuates diabetic tubulopathy by improving mitochondrial fragmentation and autophagy. *Am J Physiol Renal Physiol.* 2019;317(4):F767-F780.
  159. Takagi S, Li J, Takagaki Y, et al. Ipragliflozin improves mitochondrial abnormalities in renal tubules induced by a high-fat diet. *J Diabetes Investig.* 2018;9(5):1025-1032.
  160. Jigheh ZA, Haghjo AG, Argani H, et al. Empagliflozin attenuates renal and urinary markers of tubular epithelial cell injury in streptozotocin-induced diabetic rats. *Indian J Clin Biochem.* 2020;35(1):109-114.
  161. Korbut AI, Taskaeva IS, Bgatova NP, et al. SGLT2 inhibitor empagliflozin and DPP4 inhibitor linagliptin reactivate glomerular autophagy in db/db mice, a model of type 2 diabetes. *Int J Mol Sci.* 2020;21(8):2987.
  162. Kitada M, Ogura Y, Monno I, Koya D. Regulating autophagy as a therapeutic target for diabetic nephropathy. *Curr Diab Rep.* 2017;17(7):53.
  163. Lin Q, Ma Y, Chen Z, et al. Sestrin-2 regulates podocyte mitochondrial dysfunction and apoptosis under high-glucose conditions via AMPK. *Int J Mol Med.* 2020;45(5):1361-1372.
  164. Galvan DL, Green NH, Danesh FR. The hallmarks of mitochondrial dysfunction in chronic kidney disease. *Kidney Int.* 2017;92(5):1051-1057.
  165. Jia Y, Zheng Z, Yang Y, et al. MiR-4756 promotes albumin-induced renal tubular epithelial cell epithelial-to-mesenchymal transition and endoplasmic reticulum stress via targeting Sestrin2. *J Cell Physiol.* 2019;234(3):2905-2915.
  166. O'Neill J, Fasching A, Pihl L, Patinha D, Franzén S, Palm F. Acute SGLT inhibition normalizes O<sub>2</sub> tension in the renal cortex but causes hypoxia in the renal medulla in anaesthetized control and diabetic rats. *Am J Physiol Renal Physiol.* 2015;309(3):F227-F234.
  167. Jaikumkao K, Pongchaidecha A, Chueakula N, et al. Dapagliflozin, a sodium-glucose co-transporter-2 inhibitor, slows the progression of renal complications through the suppression of renal inflammation, endoplasmic reticulum stress and apoptosis in prediabetic rats. *Diabetes Obes Metab.* 2018;20(11):2617-2626.
  168. Tomita I, Kume S, Sugahara S, et al. SGLT2 inhibition mediates protection from diabetic kidney disease by promoting ketone body-induced mTORC1 inhibition. *Cell Metab.* 2020;32(3):404-419.e6.
  169. Yi W, Xie X, Du M, et al. Green tea polyphenols ameliorate the early renal damage induced by a high-fat diet via ketogenesis/SIRT3 pathway. *Oxid Med Cell Longev.* 2017;2017:9032792.
  170. Lu Y, Yang YY, Zhou MW, et al. Ketogenic diet attenuates oxidative stress and inflammation after spinal cord injury by activating Nrf2 and suppressing the NF-κB signaling pathways. *Neurosci Lett.* 2018;683:13-18.
  171. Packer M. Role of ketogenic starvation sensors in mediating the renal protective effects of SGLT2 inhibitors in type 2 diabetes. *J Diabetes Complications.* 2020;34(9):107647.
  172. Abbas NAT, El Salem A, Awad MM. Empagliflozin, SGLT2 inhibitor, attenuates renal fibrosis in rats exposed to unilateral ureteric obstruction: potential role of klotho expression. *Naunyn Schmiedebergs Arch Pharmacol.* 2018;391(12):1347-1360.
  173. Gallo LA, Ward MS, Fotheringham AK, et al. Once daily administration of the SGLT2 inhibitor, empagliflozin, attenuates markers of renal fibrosis without improving albuminuria in diabetic db/db mice. *Sci Rep.* 2016;6(1):1-17.
  174. Heerspink HJL, Perco P, Mulder S, et al. Canagliflozin reduces inflammation and fibrosis biomarkers: a potential mechanism of action for beneficial effects of SGLT2 inhibitors in diabetic kidney disease. *Diabetologia.* 2019;62(7):1154-1166.
  175. Cho NJ, Han DJ, Lee JH, et al. Soluble klotho as a marker of renal fibrosis and podocyte injuries in human kidneys. *PLoS One.* 2018;13(3):e0194617.
  176. Doi S, Zou Y, Togao O, et al. Klotho inhibits transforming growth factor-β1 (TGF-β1) signaling and suppresses renal fibrosis and cancer metastasis in mice. *J Biol Chem.* 2011;286(10):8655-8665.
  177. Satoh M, Nagasu H, Morita Y, Yamaguchi TP, Kanwar YS, Kashiwara N. Klotho protects against mouse renal fibrosis

- by inhibiting Wnt signaling. *Am J Physiol Renal Physiol*. 2012;303(12):F1641-F1651.
178. Liu QF, Ye JM, Deng ZY, Yu LX, Sun Q, Li SS. Ameliorating effect of Klotho on endoplasmic reticulum stress and renal fibrosis induced by unilateral ureteral obstruction. *Iran J Kidney Dis*. 2015;9(4):291-297.
  179. Jin M, Lv P, Chen G, et al. Klotho ameliorates cyclosporine A-induced nephropathy via PDLIM2/NF-kB p65 signaling pathway. *Biochem Biophys Res Commun*. 2017;486(2):451-457.
  180. Bose M, Almas S, Prabhakar S. Wnt signaling and podocyte dysfunction in diabetic nephropathy. *J Investig Med*. 2017;65(8):1093-1101.
  181. Guo Q, Zhong W, Duan A, et al. Protective or deleterious role of Wnt/beta-catenin signaling in diabetic nephropathy: an unresolved issue. *Pharmacol Res*. 2019;144:151-157.
  182. Inoue MK, Matsunaga Y, Nakatsu Y, et al. Possible involvement of normalized Pin1 expression level and AMPK activation in the molecular mechanisms underlying renal protective effects of SGLT2 inhibitors in mice. *Diabetol Metab Syndr*. 2019;11:57.
  183. Reese S, Vidyasagar A, Jacobson L, et al. The Pin 1 inhibitor juglone attenuates kidney fibrogenesis via Pin 1-independent mechanisms in the unilateral ureteral occlusion model. *Fibrogenesis Tissue Repair*. 2010;3:1.
  184. Shen ZJ, Hu J, Shiizaki K, Kuro-o M, Malter JS. Phosphate-induced renal fibrosis requires the prolyl isomerase Pin1. *PLoS One*. 2016;11(2):e0150093.
  185. Jigheh ZA, Haghjo AG, Argani H, et al. Empagliflozin alleviates renal inflammation and oxidative stress in streptozotocin-induced diabetic rats partly by repressing HMGB1-TLR4 receptor axis. *Iran J Basic Med Sci*. 2019;22(4):384.
  186. Teissier T, Boulanger É. The receptor for advanced glycation end-products (RAGE) is an important pattern recognition receptor (PRR) for inflammaging. *Biogerontology*. 2019;20(3):279-301.
  187. Jiang K, Guo S, Zhang T, et al. Downregulation of TLR4 by miR-181a provides negative feedback regulation to lipopolysaccharide-induced inflammation. *Front Pharmacol*. 2018;9:142.
  188. Zhang C, Dong H, Chen F, Wang Y, Ma J, Wang G. The HMGB1-RAGE/TLR-TNF- $\alpha$  signaling pathway may contribute to kidney injury induced by hypoxia. *Exp Ther Med*. 2019;17(1):17-26.
  189. Chen X, Ma J, Kwan T, et al. Blockade of HMGB1 attenuates diabetic nephropathy in mice. *Sci Rep*. 2018;8(1):1-13.
  190. Shin SJ, Chung S, Kim SJ, et al. Effect of sodium-glucose co-transporter 2 inhibitor, dapagliflozin, on renal renin-angiotensin system in an animal model of type 2 diabetes. *PLoS One*. 2016;11(11):e0165703.
  191. Woods TC, Satou R, Miyata K, et al. Canagliflozin prevents intrarenal angiotensinogen augmentation and mitigates kidney injury and hypertension in mouse model of type 2 diabetes mellitus. *Am J Nephrol*. 2019;49(4):331-342.
  192. Petrykiv S, Laverman GD, de Zeeuw D, Heerspink HJL. Does SGLT 2 inhibition with dapagliflozin overcome individual therapy resistance to RAAS inhibition? *Diabetes Obes Metab*. 2018;20(1):224-227.
  193. Koszegi S, Molnar A, Lenart L, et al. RAAS inhibitors directly reduce diabetes-induced renal fibrosis via growth factor inhibition. *J Physiol*. 2019;597(1):193-209.
  194. Xu R, Sun S, Huo Y, Yun L, Huang S, Li G, Yan S. Effects of ACEIs versus ARBs on proteinuria or albuminuria in primary hypertension: a meta-analysis of randomized trials. *Medicine*. 2015;94(39):e1560.
  195. Mishima E, Haruna Y, Arima H. Renin-angiotensin system inhibitors in hypertensive adults with non-diabetic CKD with or without proteinuria: a systematic review and meta-analysis of randomized trials. *Hypertens Res*. 2019;42(4):469-482.
  196. Kojima N, Williams JM, Slaughter TN, et al. Renoprotective effects of combined SGLT 2 and ACE inhibitor therapy in diabetic Dahl S rats. *Physiol Rep*. 2015;3(7):e12436.
  197. Mantovani A, Petracca G, Csermely A, Beatrice G, Targher G. Sodium-glucose cotransporter-2 inhibitors for treatment of nonalcoholic fatty liver disease: a meta-analysis of randomized controlled trials. *Metabolites*. 2021;11(1):22.
  198. Coelho FdS, Borges-Canha M, von Hafe M, et al. Effects of sodium-glucose co-transporter 2 inhibitors on liver parameters and steatosis: a meta-analysis of randomized clinical trials. *Diabetes Metab Res Rev*. Published online October. 2020. doi: 10.1002/dmrr.3413
  199. Sinha B, Datta D, Ghosal S. Meta-analysis of the effects of sodium glucose cotransporter 2 inhibitors in non-alcoholic fatty liver disease patients with type 2 diabetes. *JGH Open*. 2020;5(2):219-227.
  200. Kuchay MS, Krishan S, Mishra SK, et al. Effect of empagliflozin on liver fat in patients with type 2 diabetes and nonalcoholic fatty liver disease: a randomized controlled trial (E-LIFT Trial). *Diabetes Care*. 2018;41(8):1801-1808.
  201. Latva-Rasku A, Honka MJ, Kullberg J, et al. The SGLT2 inhibitor dapagliflozin reduces liver fat but does not affect tissue insulin sensitivity: a randomized, double-blind, placebo-controlled study with 8-week treatment in type 2 diabetes patients. *Diabetes Care*. 2019;42(5):931-937.
  202. Kahl S, Gancheva S, Straßburger K, et al. Empagliflozin effectively lowers liver fat content in well-controlled type 2 diabetes: a randomized, double-blind, phase 4, placebo-controlled trial. *Diabetes Care*. 2020;43(2):298-305.
  203. Cusi K, Bril F, Barb D, et al. Effect of canagliflozin treatment on hepatic triglyceride content and glucose metabolism in patients with type 2 diabetes. *Diabetes Obes Metab*. 2019;21(4):812-821.
  204. Ito D, Shimizu S, Inoue K, et al. Comparison of ipragliflozin and pioglitazone effects on nonalcoholic fatty liver disease in patients with type 2 diabetes: a randomized, 24-week, open-label, active-controlled trial. *Diabetes Care*. 2017;40(10):1364-1372.
  205. Cabrera CC, Francisco ME, Dampil OAC. MON-602 the efficacy and safety of sodium-glucose transport protein 2 (SGLT-2) inhibitors for weight loss among individuals without diabetes: a systematic review and meta-analysis. *J Endocr Soc*. 2020;4(suppl 1):MON-602.
  206. Zaman M, Memon RS, Amjad A, et al. Effect of ertugliflozin on glycemic levels, blood pressure and body weight of patients with type 2 diabetes mellitus: a systematic review and meta-analysis. *J Diabetes Metab Disord*. 2020;19(2):1873-1878.
  207. Cai X, Gao X, Yang W, et al. No disparity of the efficacy and all-cause mortality between Asian and non-Asian type 2 diabetes patients with sodium-glucose cotransporter 2 inhibitors treatment: a meta-analysis. *J Diabetes Investig*. 2018;9(4):850-861.
  208. Mantsiou C, Karagiannis T, Kakotrichi P, et al. Glucagon-like peptide-1 receptor agonists and sodium-glucose

- co-transporter-2 inhibitors as combination therapy for type 2 diabetes: A systematic review and meta-analysis. *Diabetes Obes Metab.* 2020;22(10):1857-1868.
209. Maruthur NM, Tseng E, Huttlless S, et al. Diabetes medications as monotherapy or metformin-based combination therapy for type 2 diabetes: a systematic review and meta-analysis. *Ann Intern Med.* 2016;164(11):740-751.
  210. Koutoukidis DA, Astbury NM, Tudor KE, et al. Association of weight loss interventions with changes in biomarkers of nonalcoholic fatty liver disease: a systematic review and meta-analysis. *JAMA Intern Med.* 2019;179(9):1262-1271.
  211. Yeo SC, Ong WM, Cheng KSA, Tan CH. Weight loss after bariatric surgery predicts an improvement in the non-alcoholic fatty liver disease (NAFLD) fibrosis score. *Obes Surg.* 2019;29(4):1295-1300.
  212. Hayashi T, Fukui T, Nakanishi N, et al. Dapagliflozin decreases small dense low-density lipoprotein-cholesterol and increases high-density lipoprotein 2-cholesterol in patients with type 2 diabetes: comparison with sitagliptin. *Cardiovasc Diabetol.* 2017;16(1):8.
  213. Katsiki N, Mikhailidis DP, Mantzoros CS. Non-alcoholic fatty liver disease and dyslipidemia: an update. *Metabolism.* 2016;65(8):1109-1123.
  214. ElMahdy MK, Helal MG, Ebrahim TM. Potential anti-inflammatory effect of dapagliflozin in HCHF diet- induced fatty liver degeneration through inhibition of TNF- $\alpha$ , IL-1 $\beta$ , and IL-18 in rat liver. *Int Immunopharmacol.* 2020;86:106730.
  215. Wang D, Luo Y, Wang X, et al. The sodium-glucose cotransporter 2 inhibitor dapagliflozin prevents renal and liver disease in western diet induced obesity mice. *Int J Mol Sci.* 2018;19(1):137.
  216. Ahn S-HK, Lee Y-J, You Y-H, et al. Effect of sodium-glucose co-transporter 2 inhibitor, empagliflozin, on hepatic steatosis in an animal model of type 2 diabetes. *J Cell Biochem.* Published online November 2018. doi: 10.1002/jcb.28141
  217. Lv Q, Le L, Xiang J, Jiang B, Chen S, Xiao P. Liver transcriptomic reveals novel pathways of empagliflozin associated with type 2 diabetic rats. *Front Endocrinol (Lausanne).* 2020;11:111.
  218. Jojima T, Tomotsune T, Iijima T, Akimoto K, Suzuki K, Aso Y. Empagliflozin (an SGLT2 inhibitor), alone or in combination with linagliptin (a DPP-4 inhibitor), prevents steatohepatitis in a novel mouse model of non-alcoholic steatohepatitis and diabetes. *Diabetol Metab Syndr.* 2016;8:45.
  219. Tahara A, Kurosaki E, Yokono M, et al. Effects of SGLT2 selective inhibitor ipragliflozin on hyperglycemia, hyperlipidemia, hepatic steatosis, oxidative stress, inflammation, and obesity in type 2 diabetic mice. *Eur J Pharmacol.* 2013;715(1-3):246-255.
  220. Kabil SL, Mahmoud NM. Canagliflozin protects against non-alcoholic steatohepatitis in type-2 diabetic rats through zinc alpha-2 glycoprotein up-regulation. *Eur J Pharmacol.* 2018;828:135-145.
  221. Petito-da-Silva TI, Souza-Mello V, Barbosa-da-Silva S. Empagliflozin mitigates NAFLD in high-fat-fed mice by alleviating insulin resistance, lipogenesis and ER stress. *Mol Cell Endocrinol.* 2019;498:110539.
  222. Fusakio ME, Willy JA, Wang Y, et al. Transcription factor ATF4 directs basal and stress-induced gene expression in the unfolded protein response and cholesterol metabolism in the liver. *Mol Biol Cell.* 2016;27(9):1536-1551.
  223. Ji C, Mehrian-Shai R, Chan C, Hsu YH, Kaplowitz N. Role of CHOP in hepatic apoptosis in the murine model of intragastric ethanol feeding. *Alcohol Clin Exp Res.* 2005;29(8):1496-1503.
  224. Khan SA, Sathyannarayan A, Mashek MT, Ong KT, Wollaston-Hayden EE, Mashek DG. ATGL-catalyzed lipolysis regulates SIRT1 to control PGC-1 $\alpha$ /PPAR- $\alpha$  signaling. *Diabetes.* 2015;64(2):418-426.
  225. Varga T, Czimmerer Z, Nagy L. PPARs are a unique set of fatty acid regulated transcription factors controlling both lipid metabolism and inflammation. *Biochim Biophys Acta.* 2011;1812(8):1007-1022.
  226. Chyau C-C, Wang H-F, Zhang W-J, et al. Antrodan alleviates high-fat and high-fructose diet-induced fatty liver disease in C57BL/6 mice model via AMPK/Sirt1/SREBP-1c/PPAR $\gamma$  pathway. *Int J Mol Sci.* 2020;21(1):360.
  227. Russell S, Tisdale M. Studies on the anti-obesity activity of zinc- $\alpha$  2-glycoprotein in the rat. *Int J Obes.* 2011;35(5):658-665.
  228. Russell ST, Tisdale MJ. Studies on the antiobesity effect of zinc- $\alpha$  2-glycoprotein in the ob/ob mouse. *Int J Obes.* 2011;35(3):345-354.
  229. Hong S, Song W, Zushin PH, et al. Phosphorylation of Beta-3 adrenergic receptor at serine 247 by ERK MAP kinase drives lipolysis in obese adipocytes. *Mol Metab.* 2018;12:25-38.
  230. Ge M, Guo R, Lou HX, Zhang W. Extract of Paecilomyces hepiali mycelia induces lipolysis through PKA-mediated phosphorylation of hormone-sensitive lipase and ERK-mediated downregulation of perilipin in 3T3-L1 adipocytes. *BMC Complement Altern Med.* 2018;18(1):326.
  231. Atageldiyeva K, Fujita Y, Yanagimachi T, et al. Sodium-glucose cotransporter 2 inhibitor and a low carbohydrate diet affect gluconeogenesis and glycogen content differently in the kidney and the liver of non-diabetic mice. *PLoS One.* 2016;11(6):e0157672.
  232. Swe MT, Thongnak L, Jaikumkao K, Pongchaidecha A, Chatsudthipong V, Lungkaphin A. Dapagliflozin not only improves hepatic injury and pancreatic endoplasmic reticulum stress, but also induces hepatic gluconeogenic enzymes expression in obese rats. *Clin Sci (Lond).* 2019;133(23):2415-2430.
  233. Wada T, Kenmochi H, Miyashita Y, et al. Spirolactone improves glucose and lipid metabolism by ameliorating hepatic steatosis and inflammation and suppressing enhanced gluconeogenesis induced by high-fat and high-fructose diet. *Endocrinology.* 2010;151(5):2040-2049.
  234. Sunny NE, Parks EJ, Browning JD, Burgess SC. Excessive hepatic mitochondrial TCA cycle and gluconeogenesis in humans with nonalcoholic fatty liver disease. *Cell Metab.* 2011;14(6):804-810.
  235. Patel TP, Rawal K, Soni S, Gupta S. Swertiamarin ameliorates oleic acid induced lipid accumulation and oxidative stress by attenuating gluconeogenesis and lipogenesis in hepatic steatosis. *Biomed Pharmacother.* 2016;83:785-791.
  236. Benetti E, Mastrocola R, Vitarelli G, et al. Empagliflozin protects against diet-induced NLRP-3 inflammasome activation and lipid accumulation. *J Pharmacol Exp Ther.* 2016;359(1):45-53.
  237. Wan X, Xu C, Yu C, Li Y. Role of NLRP3 inflammasome in the progression of NAFLD to NASH. *Can J Gastroenterol Hepatol.* 2016;2016:6489012.

238. Wree A, McGeough MD, Peña CA, et al. NLRP3 inflammasome activation is required for fibrosis development in NAFLD. *J Mol Med (Berl)*. 2014;**92**(10):1069-1082.
239. Nishimura N, Kitade M, Noguchi R, et al. Ipragliflozin, a sodium-glucose cotransporter 2 inhibitor, ameliorates the development of liver fibrosis in diabetic Otsuka Long-Evans Tokushima fatty rats. *J Gastroenterol*. 2016;**51**(12):1141-1149.
240. Hayashizaki-Someya Y, Kurosaki E, Takasu T, et al. Ipragliflozin, an SGLT2 inhibitor, exhibits a prophylactic effect on hepatic steatosis and fibrosis induced by choline-deficient l-amino acid-defined diet in rats. *Eur J Pharmacol*. 2015;**754**:19-24.
241. Tang L-Y, Heller M, Meng Z, et al. Transforming growth factor- $\beta$  (TGF- $\beta$ ) directly activates the JAK1-STAT3 axis to induce hepatic fibrosis in coordination with the SMAD pathway. *J Biol Chem*. 2017;**292**(10):4302-4312.
242. Aso Y, Kato K, Sakurai S, et al. Impact of dapagliflozin, an SGLT2 inhibitor, on serum levels of soluble dipeptidyl peptidase-4 in patients with type 2 diabetes and non-alcoholic fatty liver disease. *Int J Clin Pract*. 2019;**73**(5):e13335.
243. Imeta T, Shirakami Y, Miyazaki T, et al. The dipeptidyl peptidase-4 inhibitor teneligliptin attenuates hepatic lipogenesis via AMPK activation in non-alcoholic fatty liver disease model mice. *Int J Mol Sci*. 2015;**16**(12):29207-29218.
244. Aroor AR, Habibi J, Ford DA, et al. Dipeptidyl peptidase-4 inhibition ameliorates western diet-induced hepatic steatosis and insulin resistance through hepatic lipid remodeling and modulation of hepatic mitochondrial function. *Diabetes*. 2015;**64**(6):1988-2001.
245. Sakai Y, Chen G, Ni Y, et al. DPP-4 inhibition with anagliptin reduces lipotoxicity-induced insulin resistance and steatohepatitis in male mice. *Endocrinology*. 2020;**161**(10):bqaa139.
246. Makri E, Kita M, Goulas A, et al. Comparative effectiveness of glucagon-like peptide-1 receptor agonists versus dipeptidyl peptidase-4 inhibitors on noninvasive indices of hepatic steatosis and fibrosis in patients with type 2 diabetes mellitus. *Diabetes Metab Syndr: Clin Res Rev*. 2020;**14**(6):1913-1919.
247. Mantovani A, Petracca G, Beatrice G, Csermely A, Lonardo A, Targher G. Glucagon-like peptide-1 receptor agonists for treatment of nonalcoholic fatty liver disease and nonalcoholic steatohepatitis: an updated meta-analysis of randomized controlled trials. *Metabolites*. 2021;**11**(2):73.
248. Tahara A, Takasu T. SGLT2 inhibitor ipragliflozin alone and combined with pioglitazone prevents progression of nonalcoholic steatohepatitis in a type 2 diabetes rodent model. *Physiol Rep*. 2019;**7**(22):e14286.
249. Tahara A, Takasu T. Therapeutic effects of SGLT2 inhibitor ipragliflozin and metformin on NASH in type 2 diabetic mice. *Endocr Res*. 2020;**45**(2):147-161.
250. Machado MV, Coutinho J, Carepa F, Costa A, Proença H, Cortez-Pinto H. How adiponectin, leptin, and ghrelin orchestrate together and correlate with the severity of nonalcoholic fatty liver disease. *Eur J Gastroenterol Hepatol*. 2012;**24**(10):1166-1172.
251. Mikami K, Endo T, Sawada N, et al. Leptin/adiponectin ratio correlates with hepatic steatosis but not arterial stiffness in nonalcoholic fatty liver disease in Japanese population. *Cytokine*. 2020;**126**:154927.
252. Yilmaz Y, Eren F, Yonal O, et al. Increased serum FGF21 levels in patients with nonalcoholic fatty liver disease. *Eur J Clin Invest*. 2010;**40**(10):887-892.
253. Eriksson JW, Lundkvist P, Jansson P-A, et al. Effects of dapagliflozin and n-3 carboxylic acids on non-alcoholic fatty liver disease in people with type 2 diabetes: a double-blind randomised placebo-controlled study. *Diabetologia*. 2018;**61**(9):1923-1934.
254. Xu L, Nagata N, Nagashimada M, et al. SGLT2 inhibition by empagliflozin promotes fat utilization and browning and attenuates inflammation and insulin resistance by polarizing M2 macrophages in diet-induced obese mice. *EBioMedicine*. 2017;**20**:137-149.
255. Osataphan S, Macchi C, Singhal G, et al. SGLT2 inhibition reprograms systemic metabolism via FGF21-dependent and -independent mechanisms. *JCI Insight*. 2019;**4**(5):e123130.
256. Kleinert M, Müller TD. A new FGF21 analog for the treatment of fatty liver disease. *Diabetes*. 2020;**69**(8):1605-1607.
257. Zarei M, Pizarro-Delgado J, Barroso E, Palomer X, Vázquez-Carrera M. Targeting FGF21 for the treatment of nonalcoholic steatohepatitis. *Trends Pharmacol Sci*. 2020;**41**(3):199-208.
258. Suga T, Kikuchi O, Kobayashi M, et al. SGLT1 in pancreatic  $\alpha$  cells regulates glucagon secretion in mice, possibly explaining the distinct effects of SGLT2 inhibitors on plasma glucagon levels. *Mol Metab*. 2019;**19**:1-12.
259. Kern M, Klötting N, Mark M, Mayoux E, Klein T, Blüher M. The SGLT2 inhibitor empagliflozin improves insulin sensitivity in db/db mice both as monotherapy and in combination with linagliptin. *Metabolism*. 2016;**65**(2):114-123.
260. Patel V, Joharapurkar A, Kshirsagar S, et al. Coagonist of GLP-1 and glucagon receptor ameliorates development of non-alcoholic fatty liver disease. *Cardiovasc Hematol Agents Med Chem*. 2018;**16**(1):35-43.
261. More VR, Lao J, McLaren DG, et al. Glucagon like receptor 1/glucagon dual agonist acutely enhanced hepatic lipid clearance and suppressed de novo lipogenesis in mice. *PLoS One*. 2017;**12**(10):e0186586.
262. von Meyenn F, Porstmann T, Gasser E, et al. Glucagon-induced acetylation of Foxa2 regulates hepatic lipid metabolism. *Cell Metabol*. 2013;**17**(3):436-447.
263. Luukkonen PK, Dufour S, Lyu K, et al. Effect of a ketogenic diet on hepatic steatosis and hepatic mitochondrial metabolism in nonalcoholic fatty liver disease. *Proc Natl Acad Sci U S A*. 2020;**117**(13):7347-7354.
264. Pérez-Guisado J, Muñoz-Serrano A. The effect of the Spanish ketogenic mediterranean diet on nonalcoholic fatty liver disease: a pilot study. *J Med Food*. 2011;**14**(7-8):677-680.
